1 **ESCRT and autophagy cooperate to repair ESX-1-dependent damage to the**  
2 ***Mycobacterium*-containing vacuole**

3  
4 Ana T. López-Jiménez<sup>a</sup>, Elena Cardenal-Muñoz<sup>a</sup>, Florence Leuba<sup>a</sup>, Lilli Gerstenmaier<sup>b</sup>, Monica Hagedorn<sup>c</sup>,  
5 Jason S. King<sup>d</sup> and Thierry Soldati<sup>a\*</sup>

6  
7  
8 <sup>a</sup>Department of Biochemistry, Faculty of Science, University of Geneva, Sciences II, 30 quai Ernest  
9 Ansermet, CH-1211 Geneva 4, Switzerland.

10  
11 <sup>b</sup>Section Parasitology, Bernhard Nocht Institute for Tropical Medicine, 20359 Hamburg, Germany.

12  
13 <sup>c</sup>Life Sciences and Chemistry, Jacobs University Bremen gGmbH, group Ribogenetics, Campus Ring 1,  
14 28759 Bremen, Germany.

15  
16 <sup>d</sup>Department of Biomedical Science, University of Sheffield, Western Bank, Sheffield S10 2TN, United  
17 Kingdom.

18  
19  
20 \*Materials requests and correspondence to: [thierry.soldati@unige.ch](mailto:thierry.soldati@unige.ch), [@SoldatiLab](https://twitter.com/SoldatiLab)

21  
22  
23

24 **Abstract**

25 Phagocytes capture invader microbes within the bactericidal phagosome. Some pathogens subvert killing  
26 by damaging and escaping from this compartment. To prevent and fight bacterial escape, cells contain and  
27 repair the membrane damage, or finally eliminate the cytosolic escapees. All eukaryotic cells engage highly  
28 conserved mechanisms to ensure integrity of membranes in a multitude of physiological and pathological  
29 situations, including the Endosomal Sorting Complex Required for Transport (ESCRT) and autophagy  
30 machineries. In *Dictyostelium discoideum*, recruitment of the ESCRT-III protein Snf7/Chmp4/Vps32 and  
31 the ATPase Vps4 to sites of membrane repair relies on the ESCRT-I component Tsg101 and occurs in  
32 absence of Ca<sup>2+</sup>. The ESX-1 dependent membrane perforations produced by the pathogen *Mycobacterium*  
33 *marinum* separately engage both ESCRT and autophagy. In absence of Tsg101, *M. marinum* escapes earlier  
34 to the cytosol, where it is restricted by xenophagy. We propose that ESCRT has an evolutionary conserved  
35 function in containing intracellular pathogens in intact compartments.

36

37

38

39

40

41

42

43 **Keywords**

44 ESCRT, autophagy, membrane damage, membrane repair, infection, innate immunity, ESX-1,  
45 *Mycobacterium*-containing vacuole, *Dictyostelium discoideum*, *Mycobacterium marinum*.

46

## 47 **Introduction**

48 After phagocytic uptake, the closely related pathogenic bacteria *Mycobacterium tuberculosis* and *M.*  
49 *marinum* reside in an altered and maturation-arrested phagosome, thereby avoiding its toxic chemical  
50 environment<sup>1</sup>, but remaining protected from the cell-autonomous cytosolic defences<sup>2</sup>. This *Mycobacterium*-  
51 containing vacuole (MCV) becomes permissive for the bacilli to survive and replicate<sup>3,4</sup>. However, bacteria  
52 access to nutrients is limited. To circumvent this restriction, tubercular mycobacteria damage the MCV and  
53 escape to the cytosol. The site of MCV rupture becomes a complex battlefield where various machineries  
54 cooperate to repair membrane damage and control cytosolic bacteria. Here, we used the *Dictyostelium*  
55 *discoideum*-*M. marinum* system to study the role of Endosomal Sorting Complex Required for Transport  
56 (ESCRT) and autophagy in membrane repair during both sterile and pathogen-induced damage. We show  
57 that the function of ESCRT-III in membrane repair is evolutionarily conserved, that it contributes to the  
58 integrity of the MCV and plays an unrecognised role in cell-autonomous defence. We also provide evidence  
59 that the ESCRT-III and autophagy pathways act in parallel to repair endomembrane compartments, but  
60 differ in their ability to restrict mycobacteria growth in the cytosol of infected cells.

61  
62 To access the cytosol, mycobacteria make use of a crucial pathogenicity locus, the Region of  
63 Difference 1 (RD1), which encodes the ESX-1 system responsible for the secretion of the membranolytic  
64 peptide ESAT-6<sup>5</sup>. The membrane perforations produced by ESAT-6 cause MCV rupture and bacterial  
65 escape to the cytosol<sup>3,6,7</sup>, a step that precedes egress of the bacteria and their dissemination to neighboring  
66 cells [reviewed in<sup>8,9</sup>]. At the site of MCV rupture cells need to discriminate self from non-self as well as  
67 from topologically misplaced self molecules. Damage exposes either pathogen-associated molecular  
68 patterns (PAMPs) or damage-associated molecular patterns (DAMPs, from the vacuole) to cytosolic  
69 machineries that sense them, resulting in the deposition of “repair-me” and “eat-me” signals. Among the  
70 latter, the best studied during infection by various intracellular bacteria, including mycobacteria, is  
71 ubiquitin. It is conjugated to mycobacterial or host proteins by the E3 ligases NEDD4<sup>10</sup>, Smurf1<sup>11</sup> and  
72 TRIM16<sup>12</sup> leading to the recruitment of the autophagy machinery to restrict their growth (xenophagy). In

73 addition, mammalian galectins such as Gal-3<sup>12, 13</sup>, Gal-8<sup>14</sup> and Gal-9<sup>15, 16</sup> bind to exposed luminal  
74 glycosylations of damaged endosomes<sup>17, 18</sup> or to components of the cell wall of bacterial pathogens, and thus  
75 play a defence role against mycobacterial infection. Although the signaling that leads from these eat-me  
76 tags to the recruitment of autophagy is well understood<sup>2, 19</sup>, how the recruitment of the repair machinery(ies)  
77 is mediated remains mysterious<sup>20</sup>.

78 Strikingly, autophagy has been shown to participate in restricting the growth of some bacteria<sup>20, 21</sup>,  
79 whilst also contributing to the establishment and maintenance of the compartments containing *Salmonella*  
80 Typhimurium<sup>22</sup> and *M. marinum*<sup>20</sup>. Recent studies have highlighted the potential of another cytosolic  
81 machinery, the ESCRT, in both repair of membranes damaged by sterile insults<sup>23, 24</sup> and in the control of  
82 mycobacteria infection<sup>25</sup>. ESCRT is an evolutionary-conserved machinery, composed of four protein  
83 complexes (ESCRT-0, -I, -II, -III), the AAA-ATPase Vps4 and multiple accessory proteins, involved in  
84 various processes of membrane remodeling. This is achieved by the ESCRT-III component  
85 Chmp4/Snf7/Vps32, which polymerizes in spirals that drive membrane deformation<sup>26</sup>, whereas Vps4  
86 triggers membrane scission and ESCRT-III disassembly<sup>27, 28, 29</sup>. The most studied functions are in the  
87 invagination of intraluminal vesicles of multivesicular bodies, which is initiated by the ubiquitination of the  
88 cargo to be sorted<sup>30</sup>, in the release of viruses by budding off the plasma membrane<sup>31</sup> and in the constriction  
89 of the cytokinetic bridge during mitosis<sup>32</sup>. Additional roles for ESCRT have been uncovered, such as  
90 exosome and microvesicle biogenesis, neuron pruning, removal of defective nuclear pores, and micro- and  
91 macroautophagy<sup>33</sup>. Importantly, ESCRT-III has also recently been proposed to mediate repair at a number  
92 of membranes such as plasma membrane wounds of less than 100 nm, possibly by surface extrusion<sup>23</sup>, as  
93 well as small disruptions in endolysosomes<sup>34</sup>. The ESCRT complexes are implicated in infection of  
94 *Drosophila* S2 cells with *M. fortuitum*<sup>35</sup> and *Listeria monocytogenes*<sup>36</sup>. Follow-up studies showed that  
95 depletion of the ESCRT proteins Vps28 or Tsg101 lead to an increase of *M. smegmatis* proliferation in  
96 RAW macrophages. These bacteria were found to be highly ubiquitinated at 3 hours post-infection (hpi) in  
97 S2 cells, and electron microscopy (EM) inspection revealed that most of them were inside a vacuolar  
98 compartment. In the case of *L. monocytogenes*, a mutant unable to secrete the pore-forming toxin LLO, but



99 still expressing two membranolytic phospholipases C, was found to escape more to the cytosol in S2 cells  
100 devoid of several ESCRT proteins (Bro/ALIX/AlxA, Vps4 and Snf7/Chmp4/Vps32)<sup>37</sup>. In this context,  
101 ESCRT was involved in membrane trafficking and the establishment of the pathogen-containing  
102 compartment. However, whether ESCRT plays a role in the repair of damage inflicted by the bacteria  
103 remains to be addressed.

104 Recent reports brought evidence for a role of ESCRT-III in repairing sterile damages to various  
105 membranes, such as the plasma membrane (laser wounding, detergents, pore-forming toxins)<sup>23, 24</sup>, the  
106 nuclear membrane (laser wounding and confined cell migration)<sup>38, 39</sup> and endolysosomes (lysosomotropic  
107 compounds and silica crystals)<sup>34</sup>. ESCRT-III recruitment to damage at the plasma membrane and lysosomes  
108 was proposed to depend on the recognition of a local increase of Ca<sup>2+</sup> by ALIX and/or ALG2<sup>23, 24, 34</sup>. In all  
109 other cases, ESCRT-III is recruited to the disrupted membranes, but the cues and signaling pathways  
110 involved remain unclear.

111 The ESCRT and autophagy machineries are highly conserved in the social amoeba *D. discoideum*<sup>41</sup>.  
112 In the last decade, *D. discoideum* has emerged as a powerful model system to study host-pathogen  
113 interactions, including with the human pathogens *Legionella pneumophila*, *Pseudomonas aeruginosa*,  
114 *Vibrio cholerae*, as well as various mycobacteria species such as *M. tuberculosis* and *M. marinum* [reviewed  
115 in<sup>40</sup>].

116

## 117 **Results**

### 118 **The ultrastructure of the MCV at the site of rupture reveals a complex battlefield between *M.* 119 *marinum* and its host**

120 Previous work demonstrated that the MCV suffers continuous ESX-1-dependent insults and injuries during  
121 infection, from the first hour post-entry, when no macroscopic sign of breakage is observed, until about 24  
122 hpi, when the bacteria escape to the cytosol<sup>3</sup>. Ubiquitination is among the first readout of damage and was  
123 shown to trigger the recruitment of the classical autophagy machinery components such as Atg18, p62 and  
124 Atg8<sup>20</sup>. In order to gain a deeper morphological and ultrastructural insight into the sites of MCV membrane

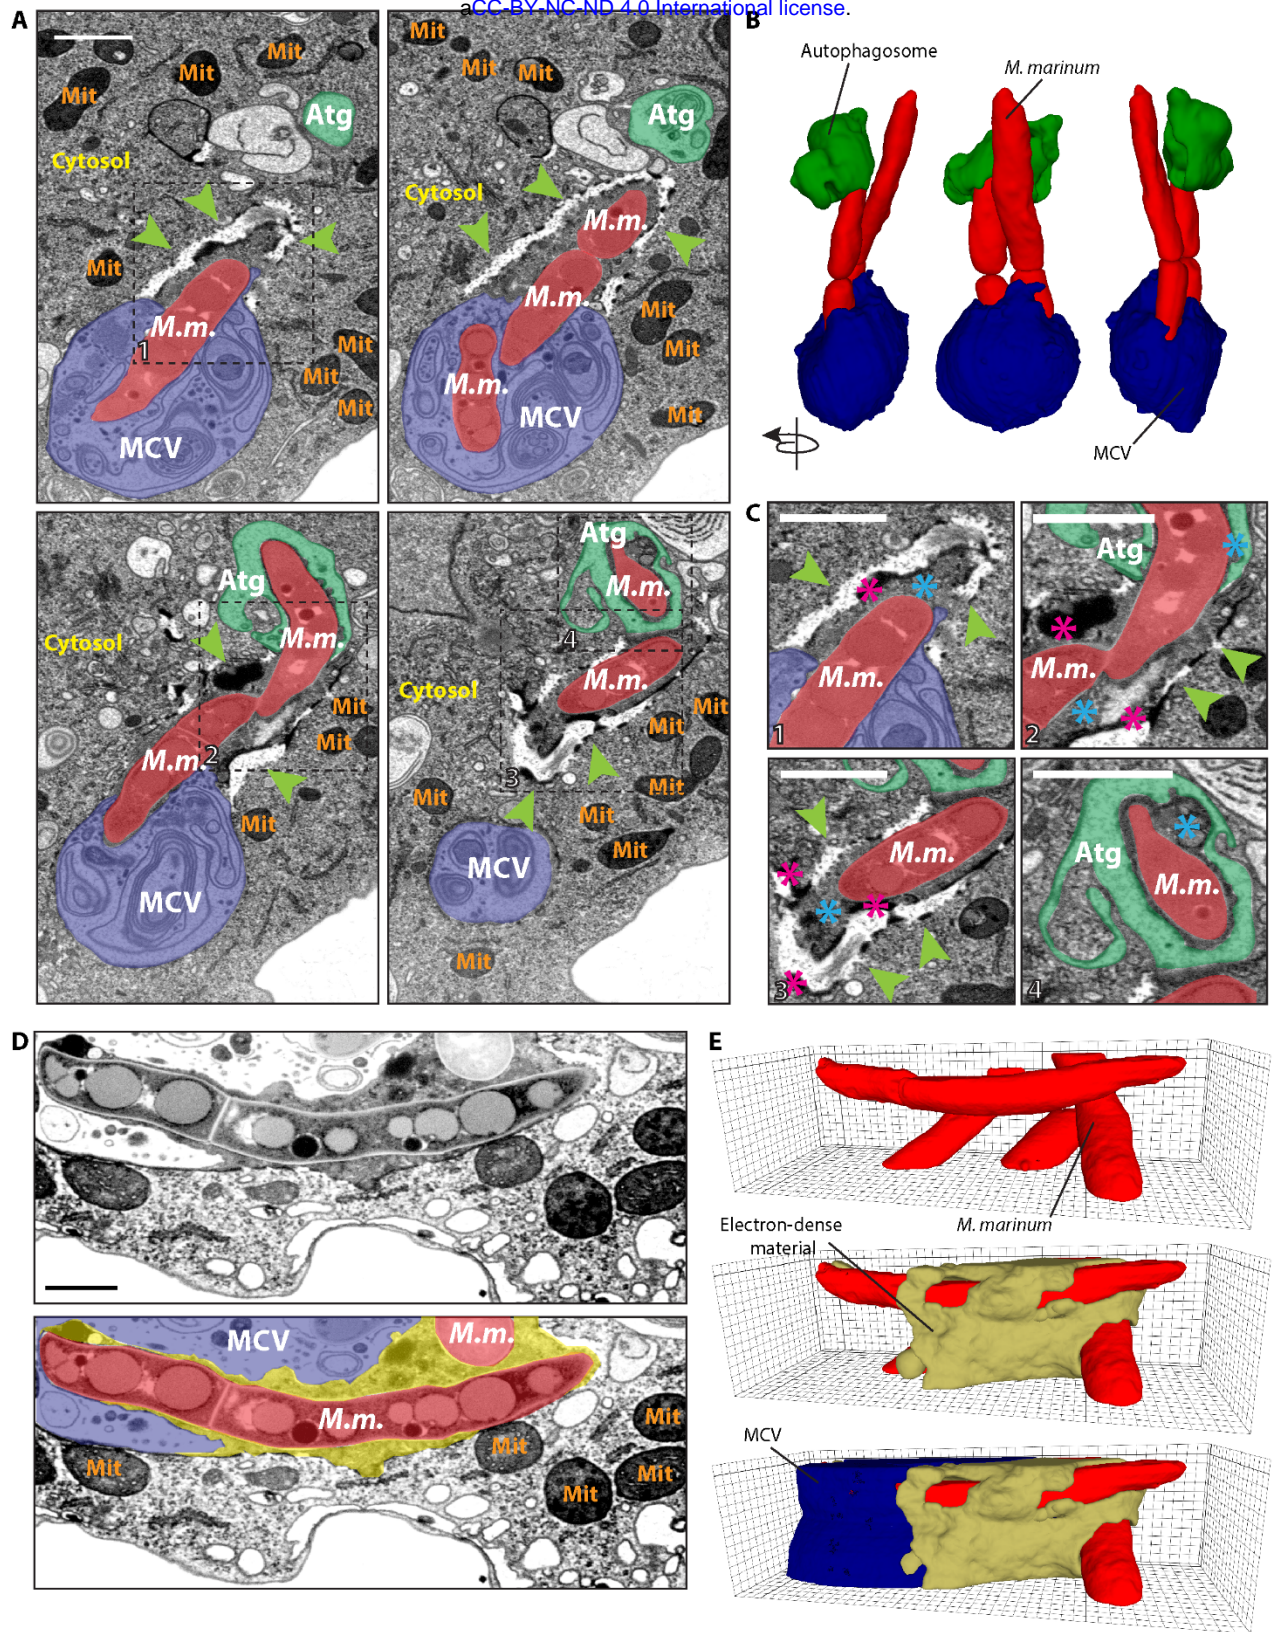

**Figure 1. The ultrastructure of the MCV at the point of rupture reveals a complex battlefield between the *M. marinum* and its host.** *D. discoideum* was infected with *M. marinum* and fixed at 24 hpi for visualization by FIB-SEM. (A) Sections of the same infected cell, showing a disrupted MCV (blue), *M. marinum* (red) accessing the cytosol and a potential autophagosome (green) engulfing the pole of a cytosolic bacterium. Green arrowheads point to a complex structure with discontinuities and electron-dense boundaries surrounding the cytosolic *M. marinum*. Squares delimitate the areas of interest magnified in C. (B) 3D reconstruction of the FIB-SEM stack shown in A. (C) The cytosolic bacteria were surrounded by a structure (green arrowheads) with very electron-dense boundaries (pink asterisks). The cytosolic material between the bacteria and this structure or the autophagosome was slightly more electron-dense than the rest of the cytosol (blue asterisks) (D). Section of a cell, showing a disrupted MCV (blue), *M. marinum* (red) and the dark electron-dense material surrounding the sites of escape (blue asterisks, yellow). (E) 3D reconstruction of the FIB-SEM stack shown in D (see also Movie S1). Abbreviations: *M. m.*, *M. marinum*; MCV, Mycobacterium-containing vacuole; Mit, Mitochondria; Atg, Autophagosome. Scale bars, 1  $\mu$ m.

125 damage during *M. marinum* infection, cells at 24 hpi were subjected to Focus Ion Beam Scanning Electron  
126 Microscopy (FIB-SEM) (Fig. 1). This revealed a complex interface between the MCV and the cytosol at  
127 the site of bacteria escape. Fig. 1A, B and C show views and 3D reconstructions of bacteria escaping from  
128 an MCV and captured by an autophagosome. The zone surrounding the portion of the bacteria in contact  
129 with the cytosol shows both discontinuities and highly electron-dense material (Fig. 1C-D). Careful  
130 inspection of the samples, together with their 3D reconstruction, revealed that this compact mass was  
131 apparently not separated from the MCV content or the host cytosol by any membrane (Fig. 1D-E and  
132 Supplementary Movie 1). These observations suggest that bacterial and host factors accumulate at the place  
133 of MCV rupture. In macrophages and *D. discoideum*, damaged MCVs and escaping *M. marinum* accumulate  
134 ubiquitin<sup>20, 42, 43</sup>. Therefore, we speculate that the dark electron-dense material observed at the areas of MCV  
135 rupture might correspond to proteins belonging to the autophagy pathway and possibly other cytosolic  
136 machineries, such as the ESCRT, recently implicated in endolysosomal membrane damage repair<sup>34</sup>.

137

### 138 **ESCRT is recruited to the MCV upon *M. marinum*-induced damage**

139 One of the first host responses to membrane damage is the ubiquitination of the bacilli and the broken MCV,  
140 followed by recruitment of the autophagy machinery to delay escape to the cytosol<sup>20</sup>. To test whether the  
141 ESCRT machinery is also recruited to damaged MCVs, cells expressing the ESCRT-I component GFP-  
142 Tsg101, the ESCRT-III effector GFP-Vps32 or the ATPase Vps4-GFP were infected with wild-type (wt)  
143 *M. marinum* or *M. marinum*  $\Delta$ RD1 (Fig. 2A-D). All three proteins were recruited to MCVs containing wt  
144 *M. marinum*, but were significantly less so in cells infected with the attenuated *M. marinum*  $\Delta$ RD1, which  
145 causes very limited membrane damage and escapes very inefficiently to the cytosol. The ESCRT-positive  
146 structures comprised small foci, patches of several micrometers and even rings that were observed to slide  
147 along the length of the bacteria compartment (Fig. 2E and Supplementary Movie 2). These structures seemed  
148 to become larger at later time-points (Fig. 2A, 24 and 31 hpi), suggesting increased recruitment upon  
149 cumulative damage as infection progresses. Careful 3D inspection at late time-points revealed that GFP-  
150 Vps32 patches always surrounded the MCV, but were not in its lumen (Fig. 2F). During membrane



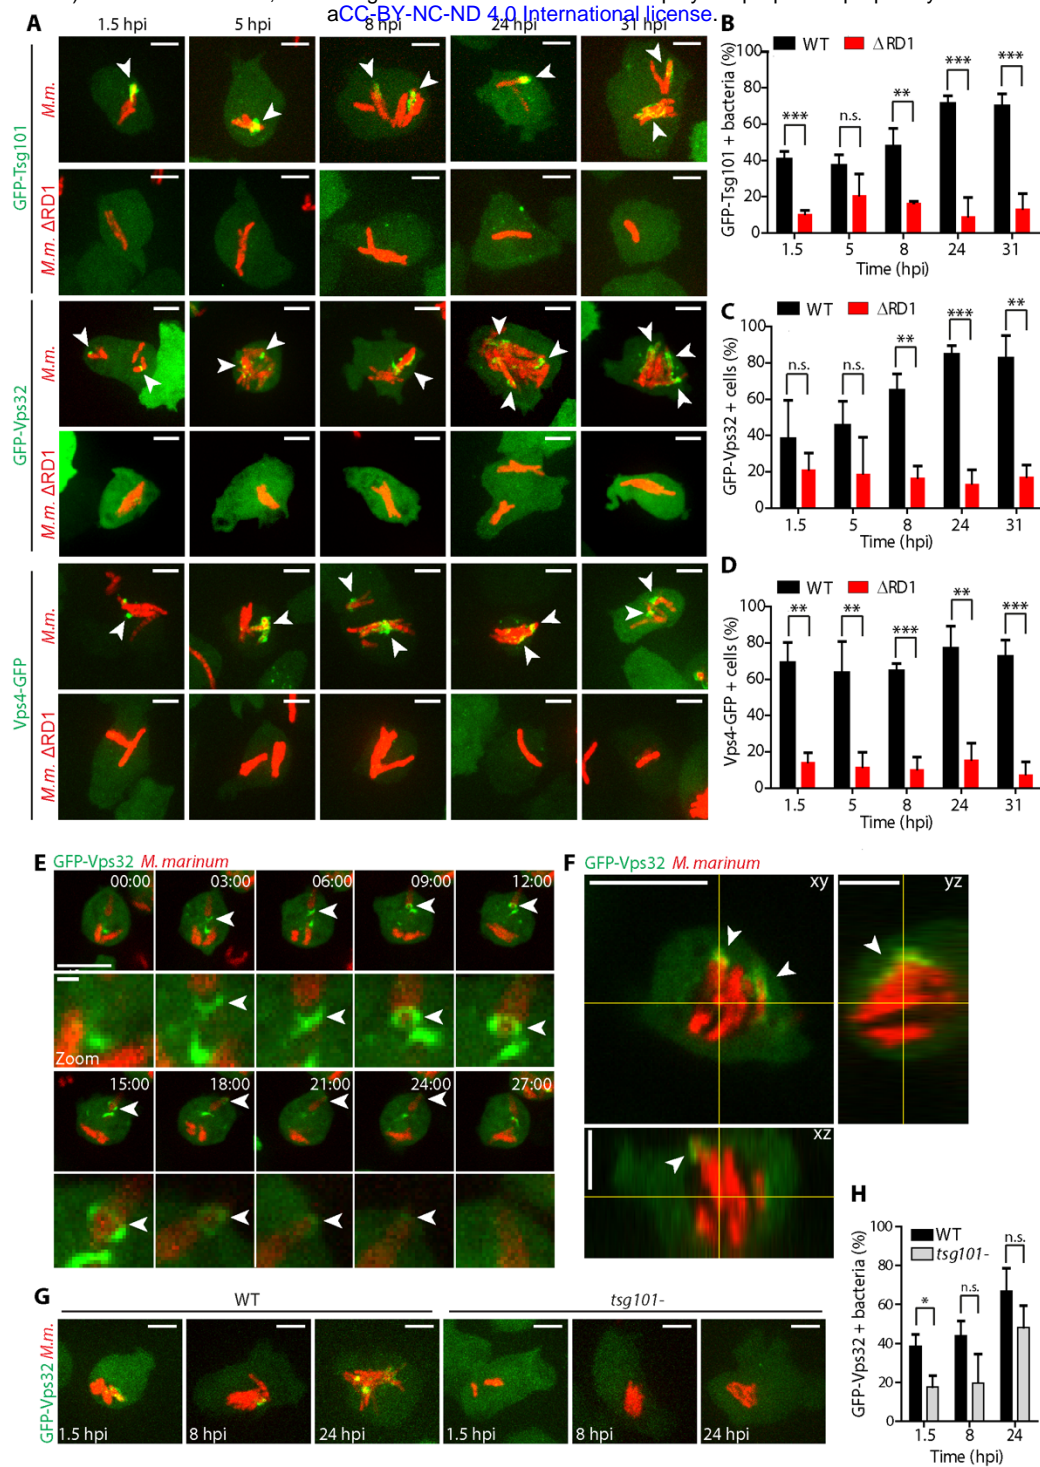

**Figure 2. Recruitment of ESCRT components to the MCV upon *M. marinum* induced damage.** (A) *D. discoideum* expressing GFP-Tsg101, GFP-Vps32 or GFP-Vps4 were infected with *M. marinum* wt or *M. marinum* ΔRD1, and z-stacks were acquired at 1.5, 5, 8, 24 and 31 hpi. Maximum projections are shown. GFP-Tsg101, GFPVps32 and Vps4-GFP structures (white arrows) appeared in the vicinity of the MCV containing *M. marinum* wt (red), and to a lesser extent around *M. marinum* ΔRD1 (red). Scale bars, 5 μm. (B-D) Quantification of GFP-Tsg101 structures (patches and foci) and GFP-Vps32 and Vps4-GFP structures (patches and rings) in the vicinity of *M. marinum* wt or *M. marinum* ΔRD1. Plots show the mean and standard deviation (GFP-Tsg101 1.5, 8, 24,31 hpi N=3, 61≤n≤246; 5 hpi N=2, 56≤n≤167, GFP-Vps32 N=3 32≤n≤145; Vps4-GFP N=3, 64≤n≤233). (E) *D. discoideum* expressing GFP-Vps32 were infected with *M. marinum* wt (red) and monitored by time-lapse microscopy every 3 min (see also Movie S2). Maximum projections of the same cell are shown (time indicated in the top right corner). GFP-Vps32 rings formed and appeared to move along the bacterium (arrows). Bottom panels show insets focused on the ring structures (arrows). Scale bars, 10 μm and 1 μm for the insets. (F) Section of a z-stack showing the recruitment of GFP-Vps32 to the vicinity of the MCV (bacteria in red) at 31 hpi. Projections of the xz and yz planes are shown. Scale bar, 10 μm. (G) *D. discoideum* wt or *tsg101*- expressing GFP-Vps32 were infected with *M. marinum* (in red) and z-stacks were acquired at 1.5, 8 and 24 hpi. Maximum projections are shown. GFP-Vps32 was recruited to a lesser extent to the MCV in *tsg101*- cells. Scale bars, 5 μm. (H) Quantification of GFP-Vps32 structures formed in the vicinity of *M. marinum* in wt or *tsg101*- cells. The plot shows the mean and standard deviation (N=3, 76≤n≤154). Two-tailed *t*-tests were performed.

151 remodeling in mammalian cells, the ESCRT-III complex can be recruited to biological membranes via  
152 several pathways, one of the most studied relies on the ESCRT-I component Tsg101<sup>44</sup>. Importantly, in cells  
153 lacking Tsg101, GFP-Vps32 structures were significantly reduced at early times of infection (Fig. 2G-H),  
154 which may indicate that *M. marinum*-induced damage triggers one or more pathways of ESCRT-III  
155 recruitment to the MCV. Altogether, we conclude that the ESCRT-III is recruited to the MCV in an ESX-1  
156 dependent manner, consistent with a role in membrane repair.

157

### 158 **ESCRT-III and autophagy are recruited to the disrupted MCV at spatially distinct sites**

159 In order to gain a deeper insight on the GFP-Vps32 structures observed during *M. marinum* infection, the  
160 precise localization of GFP-Vps32 on the MCV was analyzed. The MCV membrane was visualised by the  
161 presence of the ammonium transporter AmtA-mCherry, or antibodies against the predicted copper  
162 transporter p80<sup>20</sup> (Fig. 3A-B). MCVs with a continuous staining for p80 or AmtA-mCherry (Fig. 3A-B, 1.5  
163 hpi) were not associated with GFP-Vps32. On the contrary, compartments that displayed disrupted staining  
164 for p80 or AmtA-mCherry presented numerous GFP-Vps32 patches at the sites of membrane wounds (Fig.  
165 3A-B, 8, 24 and 31 hpi). Close inspection of these images revealed that, at sites of GFP-Vps32 recruitment,  
166 the damaged MCV membrane was sometimes invaginated towards the lumen of the compartment, away  
167 from the cytosol (Fig. 3B, 31 hpi). Time-lapse microscopy enabled tracking of the GFP-Vps32 structures  
168 associated with the MCV, indicating direct assembly onto the membrane of the compartment rather than  
169 delivery via pre-existing structures (Fig. 3C). GFP-Vps32 structures remained associated with the MCV for  
170 several minutes (Fig. 3C and Supplementary Movie 3).

171 *M. marinum* in intact MCVs stained by p80 are rarely ubiquitinated, contrary to bacteria in the  
172 cytosol (Fig. 3D). Therefore, we wondered whether Vps32 would be recruited at sites of ubiquitination,  
173 together with the main autophagy marker Atg8. Remarkably, all three proteins localized at disrupted MCVs,  
174 but the level of colocalisation of Vps32 with ubiquitin (Fig. 3E) or Atg8 (Fig. 3F) was limited. Instead,  
175 GFP-Vps32 seemed to be recruited more proximally to the membrane remnants of the MCV than ubiquitin  
176 and Atg8, which predominantly decorated the bacteria poles fully exposed to the cytosol. Besides, at the



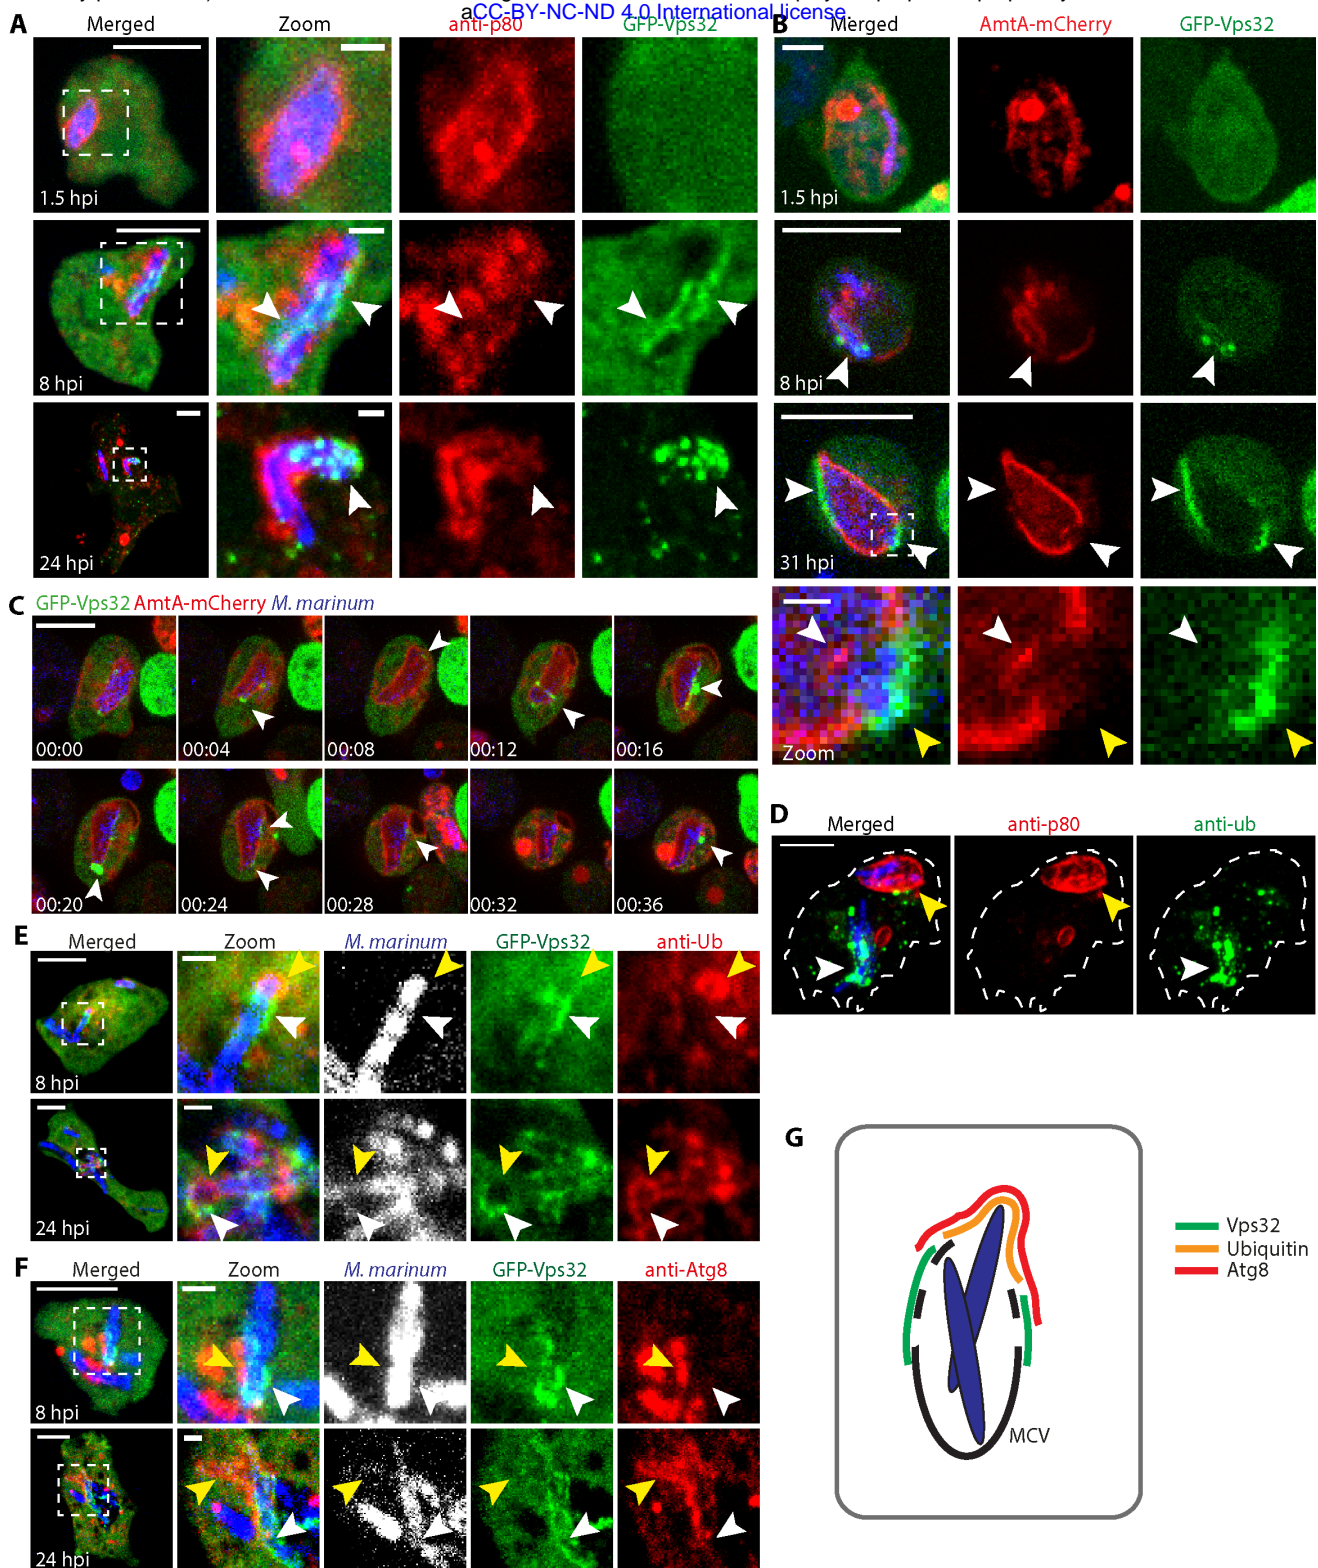

**Figure 3. GFP-Vps32 and GFP-Atg8 are recruited to the disrupted MCV at spatially distinct sites.** (A) *D. discoideum* expressing GFP-Vps32 were infected with *M. marinum* (blue) and fixed for immunostaining against p80 to label the MCV (red). At 1.5 hpi, no GFP-Vps32 structure was visible at intact MCVs. At 8 and 24 hpi, GFP-Vps32 foci and patches appeared in the vicinity of the bacteria, where the MCV was disrupted (arrows). Scale bar, 10  $\mu$ m and 1  $\mu$ m for the insets. (B-C) *D. discoideum* expressing GFP-Vps32 and AmtA-mCherry were infected with *M. marinum* (blue) and monitored by time-lapse microscopy. (B) Still images show GFP-Vps32 patches on the disrupted MCV (arrows). Insets highlight the topology of GFP-Vps32 recruitment (yellow arrow) to the damaged MCV, where the membrane appeared to invaginate towards the lumen of the MCV (white arrow). (C) Time-lapse showing the dynamics of association of GFP-Vps32 to the AmtA-mCherry labelled MCV (see also Movie S3). Scale bars, 10  $\mu$ m and 1  $\mu$ m for the insets. (D) *D. discoideum* was infected with *M. marinum* and fixed for immunostaining at 24 hpi. Only bacteria (blue) that have escaped the MCV (p80, red) showed ubiquitin structures (green). Scale bar, 5  $\mu$ m. (E-F) *D. discoideum* expressing GFP-Vps32 were infected with *M. marinum* (blue) and fixed for immunostaining at 8 and 24 hpi to visualize ubiquitin or Atg8 (red). GFP-Vps32 and ubiquitin or Atg8 were recruited to the same macroscopic region of the MCV, but they did not perfectly colocalise. GFP-Vps32 formed patches devoid of ubiquitin or Atg8 staining (white arrows). Vice versa, ubiquitin and Atg8 appeared in areas where no GFP-Vps32 was observed (yellow arrows). Scale bar, 5  $\mu$ m and 1  $\mu$ m for the insets. (G) Schematic representation of the Vps32, ubiquitin and Atg8 recruitments at the damaged MCV.

177 boundary between the zones enriched in GFP-Vps32 and Atg8, GFP-Vps32 was more proximal to the  
178 bacteria, possibly indicating an earlier recruitment (Fig. 3E-G). Taken all together, recruitment of ESCRT-  
179 III proteins to the *M. marinum* MCV seems to happen earlier and at different places than the autophagic  
180 recognition of the bacteria, suggesting that ESCRT-III and the autophagy pathway might play separate  
181 functions in repair and additionally in xenophagic capture.

182

### 183 **Differential spatial and temporal recruitment of ESCRT and autophagy upon sterile damage**

184 Mammalian ESCRT and autophagy machineries localize to damaged membranes for the repair of wounds  
185 and removal of terminally incapacitated organelles, respectively<sup>23, 24, 34, 38, 39</sup>. To test whether components of  
186 both machineries were also involved in membrane repair in *D. discoideum*, cells expressing GFP-Tsg101,  
187 GFP-Vps32 or Vps4-GFP, as well as GFP-Atg8 were subjected to membrane damaging agents, such as the  
188 detergent digitonin or the lysosome-disrupting agent Leu-Leu-O-Me (LLOMe) (Fig. 4). Digitonin inserts  
189 first into the sterol-rich plasma membrane and then, upon endocytosis, reaches the endosomes. Consistent  
190 with this, digitonin initially induced at the plasma membrane dots and crescent-shaped structures of GFP-  
191 Vps32 and Vps4-GFP (Fig. 4A and Supplementary Movie 4). After a few minutes, dispersed foci appeared  
192 throughout the cytoplasm, suggesting progressive disruption of endomembranes. In agreement with a role  
193 of ESCRT-III in repair, small foci of the ESCRT-I component Tsg101 were also observed in the vicinity of  
194 the plasma membrane with a similar timing, supporting a role upstream of the recruitment of the ESCRT-  
195 III effectors. In contrast, treatment with digitonin did not lead to the recruitment of GFP-Atg8 to the plasma  
196 membrane, but it remained present in autophagosomes (Fig. 4A and Supplementary Movie 4). These results  
197 support a role for ESCRT but not autophagy in plasma membrane repair of this type of wound. On the other  
198 hand, LLOMe induced the formation of both ESCRT- (GFP-Tsg101, GFP-Vps32 and Vps4-GFP) and  
199 autophagy- (GFP-Atg8) positive structures at the periphery of lysosomes labelled with fluorescent dextran  
200 (Fig. 4B and Supplementary Movie 5). The structures were diverse in morphology and dynamics. Whereas  
201 at 2.5 min GFP-Tsg101, GFP-Vps32 and Vps4-GFP appeared as discrete foci surrounding lysosomes, GFP-  
202 Atg8 formed a more continuous ring that became apparent only 5 min later. This spatial appearance and



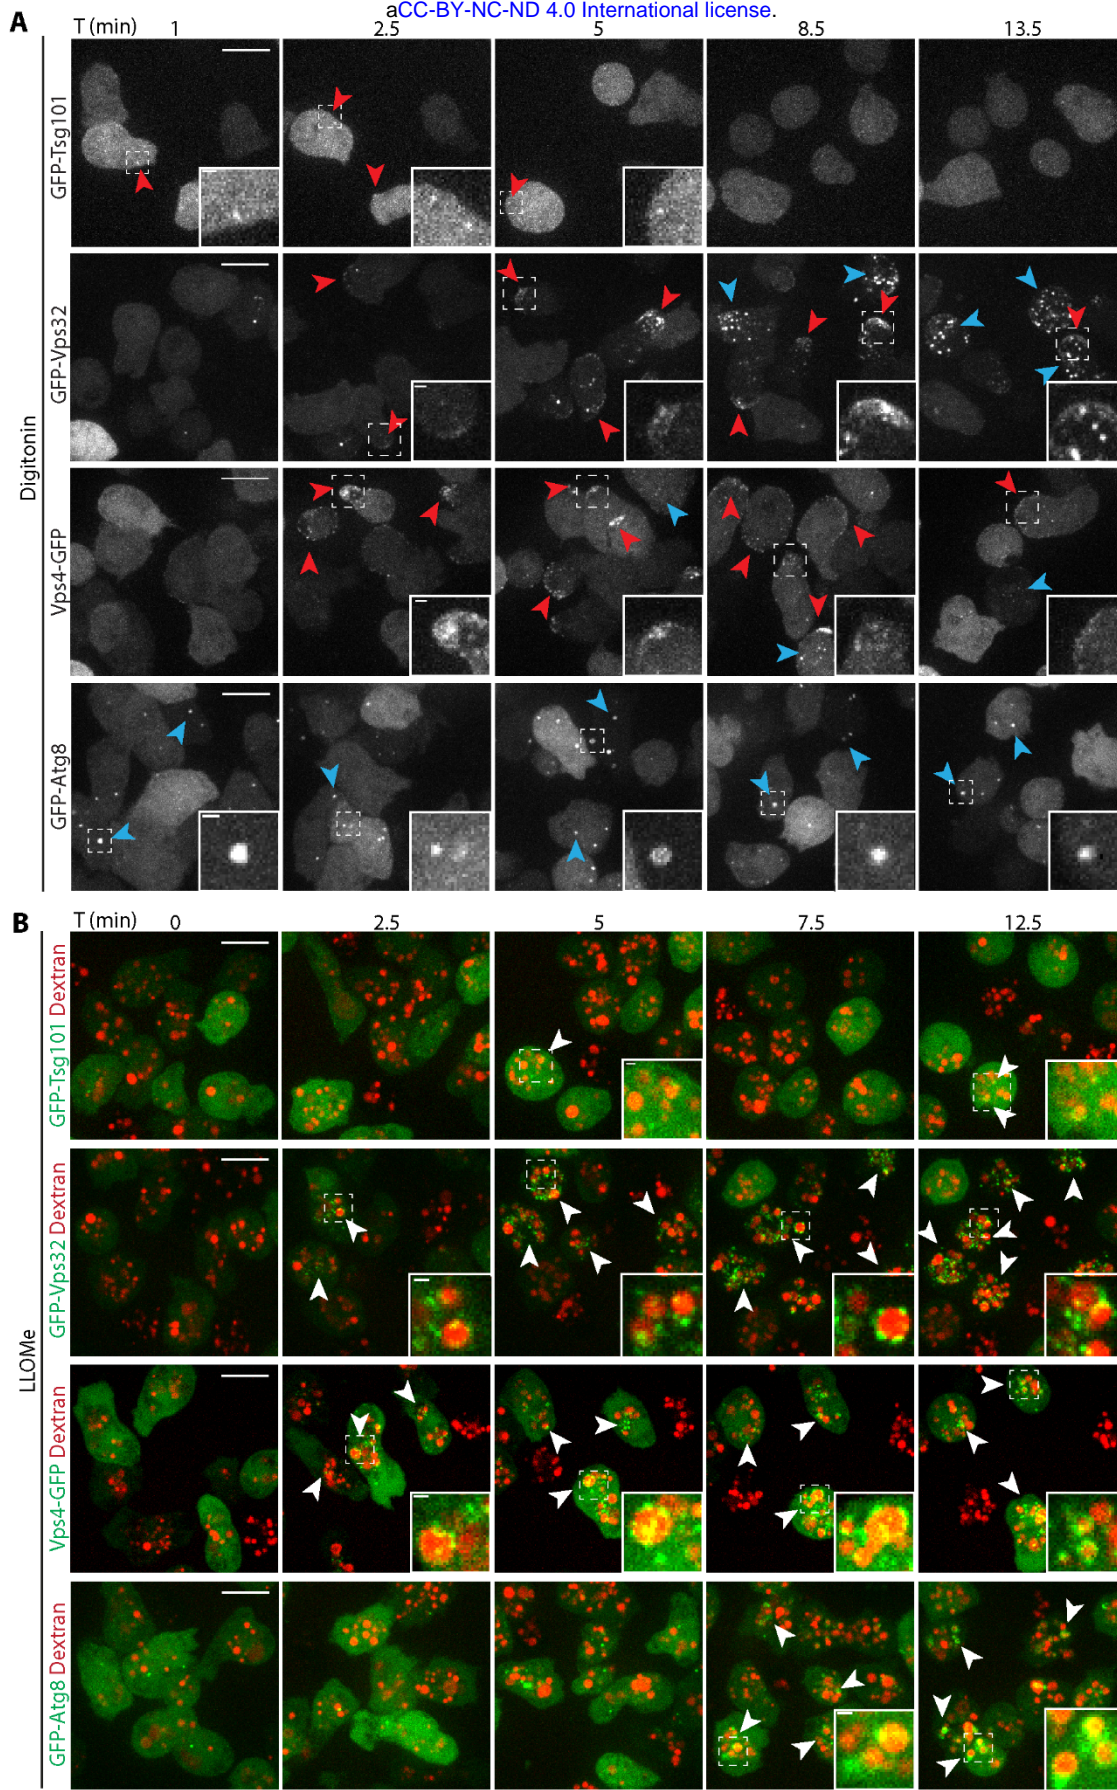

**Figure 4. Differential spatial and temporal recruitment of ESCRT components and Atg8 upon sterile damage.** *D. discoideum* expressing GFP-Tsg101, GFP-Vps32, Vps4-GFP or GFP-Atg8 were subjected to membrane disrupting agents and monitored by time-lapse imaging. (A) Treatment with digitonin led to the appearance of the three ESCRT-components but not GFP-Atg8 at the plasma membrane within minutes (see also Movie S4). (B) Cells were incubated with 10 kDa fluorescent dextran for at least 3 h to label all endosomal compartments and treated with LLOMe (see also Movie S5). Punctate ESCRT-structures appeared at the periphery of the lysosomes as early as 2.5 min after the addition of LLOMe. More diffuse, ring-like GFP-Atg8 structures were visible about 5 min later. Scale bars, 10  $\mu$ m or 1  $\mu$ m for the insets.



203 partial temporal segregation suggest an independent involvement of ESCRT-III and autophagy during  
204 lysosome damage. To confirm and extend the involvement of ESCRT-III in membrane repair in *D.*  
205 *discoideum*, cells expressing GFP-Vps32 or Vps4-GFP were monitored while exposed to other sterile  
206 damage. Purified recombinant ESAT-6 and the lysosomotropic agent glycyl-L-phenylalanine 2-  
207 naphthylamide (GPN) induced similar structures as digitonin and LLOMe (Supplementary Fig. 1). We  
208 noticed that, the structures formed by GFP-Vps32, known to build the polymers that deform membranes<sup>26</sup>  
209 were large and intense (Fig. 4 and Supplementary Fig. 1), and especially long-lived on injured lysosomes,  
210 where several foci remained in close apposition to dextran-labelled compartments for several minutes (Fig.  
211 4 and Supplementary Fig. 2). Vps4-GFP structures were less obvious but also long-lived (Fig. 4 and  
212 Supplementary Fig. 1). In contrast, GFP-Tsg101 structures were less intense and short-lived (Fig. 4),  
213 consistent with its upstream role in recruiting the membrane-remodelling ESCRT-III.

214

### 215 **Mechanistic characterization of ESCRT-III recruitment at the sites of sterile damage**

216 To confirm that the ESCRT-III structures formed at the site of membrane repair, cells expressing GFP-  
217 Vps32 were treated with digitonin in the presence of fluorescently-labelled Annexin V to reveal exofacially  
218 exposed phosphatidyl-serine (PS) (Fig. 5A-B and Supplementary Movie 6). The majority of the GFP-Vps32  
219 crescent structures were also labelled with Annexin V (Fig. 5B). The Annexin V-positive structures were  
220 released to the extracellular medium, suggesting that damaged membranes were extruded instead of  
221 internalized.

222 In mammalian cells, ESCRT-III can be recruited to membranes by at least three mechanisms  
223 depending on the identity of the membrane and the specific role exerted by ESCRT [reviewed in<sup>44</sup>]. In *D.*  
224 *discoideum* cells lacking Tsg101, GFP-Vps32 structures formed neither upon digitonin nor LLOMe  
225 treatments (Fig. 5C-D), providing a strong evidence that Tsg101 lies upstream of ESCRT-III during  
226 membrane repair caused by these types of sterile damage.

227 It has been proposed that the local increase of intracellular Ca<sup>2+</sup> upon membrane damage recruits  
228 ESCRT-III to the plasma and lysosomal membranes in HeLa cells and myoblasts<sup>23, 24, 34</sup>. To test whether the

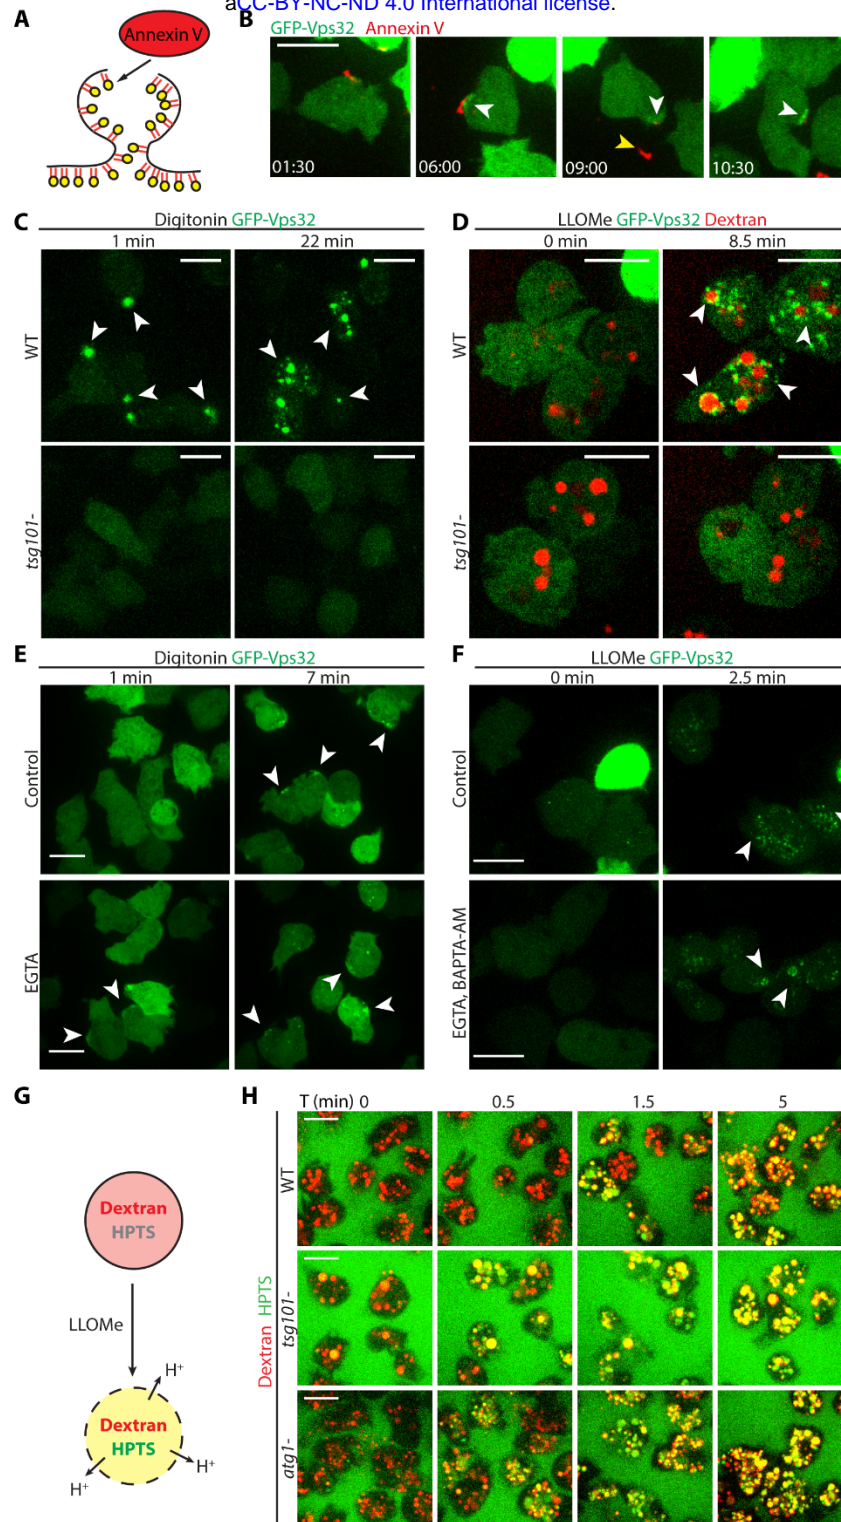

**Figure 5. Mechanistic characterization of ESCRT-III and autophagy recruitment and repair of membrane damage.** (A) Schematic representation of the experiment shown in B. Annexin V binds to PS exposed upon plasma membrane disruption. (B) *D. discoideum* were incubated with Annexin V Alexa Fluor 594 conjugate in the presence of  $\text{Ca}^{2+}$  and then treated with digitonin and monitored by time-lapse imaging (see also Movie S5). GFP-Vps32 structures (in green) appeared in close proximity of Annexin V-positive structures (in red, white arrows). At later times, the Annexin V-positive structure was released into the medium (yellow arrows), leaving a GFP-Vps32 “scar” (white arrow). Time is indicated in the bottom left corner. (C-D) In cells lacking Tsg101, neither digitonin nor LLOMe treatment led to the formation of GFP-Vps32 structures. (D) Endosomes (in red) were labelled with 10 kDa fluorescent dextran for at least 3 h. (E) Cells were incubated with EGTA or mock-incubated, treated with digitonin and monitored by time-lapse microscopy. Neither spatial nor temporal differences in GFP-Vps32 recruitment (white arrows) were observed. (F) Cells were incubated with EGTA and BAPTA-AM or mock-incubated, treated with LLOMe and monitored by time-lapse microscopy. Neither spatial nor temporal differences in GFP-Vps32 recruitment (white arrows) were observed. Scale bars correspond to 10  $\mu\text{m}$ . (G) Schematic representation of the experiment shown in H. Cells were treated for at least 3 h with the Alexa Fluor 647 10 kDa dextran (red) to label all endosomes, together with the 0.5 kDa soluble pH indicator HPTS (green). (H) *D. discoideum* wt, *tsg101-* and *atg1-* were subjected to the experimental procedure depicted in G and monitored by time-lapse imaging (see also Movie S6). Before addition of LLOMe, HPTS was quenched in acidic lysosomes, which therefore appeared in red. HPTS dequenching started after 30 sec in *tsg101-* and *atg1-* cells and after 1.5 min in wt cells.

229 formation of GFP-Vps32 structures also relied on a  $\text{Ca}^{2+}$ -mediated signaling in *D. discoideum*, cells were  
230 treated with digitonin in the presence of the non-permeant  $\text{Ca}^{2+}$  chelator EGTA, or with LLOMe in the  
231 presence of EGTA and the cell-permeant BAPTA-AM (Fig. 5E-F). None of these conditions altered the  
232 appearance nor the dynamics of the GFP-Vps32 structures at the wound site. In conclusion, in *D.*  
233 *discoideum*, ESCRT-III recruitment to membranes damaged by these sterile agents appears to be Tsg101-  
234 dependent but independent of  $\text{Ca}^{2+}$  signalling.

235  
236 **Cells lacking Tsg101 or Atg1 are defective at maintaining lysosome integrity upon LLOMe treatment**

237 To further dissect the functional contributions of the ESCRT-III and autophagy machineries to the repair of  
238 wounds inflicted by LLOMe, cells were incubated with a mixture of two fluid-phase markers: the 10 kDa  
239 pH-insensitive Alexa Fluor 647 dextran and the 0.5 kDa pH sensor 8-Hydroxypyrene-1,3,6-trisulfonic acid,  
240 trisodium salt (HPTS), which is quenched at  $\text{pH} < 6.5$  (Fig. 5G-H and Movie S7). Around 5 min after  
241 LLOMe addition, the HPTS fluorescence increased drastically and synchronously in the lysosomes of wt  
242 cells, indicating proton leakage from the compartments. In the autophagy mutant *atg1-*, which are defective  
243 in MCV/endomembrane repair<sup>20</sup>, the fluorescence dequenching happened significantly faster, a sign of  
244 earlier proton leakage. Interestingly, in *tsg101-* cells, the switch in fluorescence also happened earlier, again  
245 suggesting as for the *atg1-* cells a defect in membrane repair in these mutants.

246  
247 **Deficiencies in membrane repair lead to earlier escape of *M. marinum* from the MCV**

248 To decipher the role of ESCRT during infection, cells lacking Tsg101 or the accessory proteins AlxA and  
249 the AlxA interactors Alg2a and Alg2b were infected and examined by EM. In wt cells, *alxA-* or *alg2a-/b-*  
250 mutants, the membrane of the MCV in close vicinity to the bacilli escaping the compartment was even and  
251 smooth (Supplementary Fig. 3A, E-G). However, in the *tsg101-* mutant, rough and “bubbling” membrane  
252 structures were observed (Supplementary Fig. 3B-C), suggesting cumulating membrane damage. In all  
253 cases, escaping bacteria were surrounded by the highly electron-dense material already described in Fig. 1.

254 It was shown that in the *atg1-* mutant, *M. marinum* escapes earlier from the MCV, accumulates  
255 ubiquitin but proliferates unrestrictedly in a cytosol devoid of a bactericidal xenophagy pathway<sup>20</sup>. We  
256 reasoned that, if the ESCRT-III machinery were involved in repair of the MCV, then, in the *tsg101-* mutant,  
257 bacteria might access the cytosol and become ubiquitinated earlier. The percentage of ubiquitinated *M.*  
258 *marinum* at 8 hpi was significantly higher in the *tsg101-* ( $75.5 \pm 4.3\%$ ) than in wt cells ( $40.3 \pm 11.6\%$ , Fig.  
259 6A-B and Supplementary Fig. 4C). In agreement with the increased ubiquitination of bacteria, *M. marinum*  
260 also colocalized more with Atg8 in the *tsg101-* (Fig. 6C-D and Supplementary Fig. 4D). Although the  
261 percentage of ubiquitinated bacteria in *tsg101-* cells was close to that observed in the *atg1-* and *atg1-tsg101-*  
262 double mutants ( $84.6 \pm 3.3\%$  and  $89.3 \pm 7.5\%$ , respectively), the extent of ubiquitin decoration on the  
263 bacteria was very different (Fig. 6A-B and Supplementary Fig. 4C). Whereas in cells lacking Tsg101  
264 ubiquitin formed foci or patches around *M. marinum*, in cells devoid of autophagy bacteria were more  
265 densely coated with ubiquitin (Fig. 6A and Supplementary Fig. 4C). This accumulation is probably due to  
266 the fact that ubiquitinated bacteria cannot be targeted to autophagic degradation in the *atg1-* mutant, but  
267 autophagy is still functional in the *tsg101-* mutant.

268 Given that both ESCRT-III and autophagy are involved in the biogenesis of MVBs and  
269 autophagosomes, respectively, which rely at least partially on the recognition of ubiquitinated cargoes, we  
270 monitored the morphology of endosomes, as well as the levels of ubiquitination, in non-infected ESCRT  
271 and autophagy mutants (Supplementary Fig. 4). In the *atg1-* and *atg1-tsg101-* mutants accumulation of  
272 high levels of ubiquitinated material was observed, in agreement with the inability of these mutants to  
273 degrade it by autophagy. In *tsg101-* cells, only a minor increase of ubiquitin was observed in endosomal  
274 compartments (Supplementary Fig. 4A-B), as already reported<sup>45</sup>, which does not explain the more frequent  
275 and larger ubiquitin decorations around *M. marinum* in these cells (Fig. 6A).

276 In yeast and mammalian cells devoid of some ESCRT proteins, ubiquitinated cargoes are not  
277 properly sorted into MVBs and accumulate on the limiting membrane<sup>46</sup>. Therefore, to confirm that the  
278 increase in ubiquitination observed during infection of the *tsg101-* mutant was due to MCV damage and  
279 bacteria access to the host cytosol, and not to failed endocytic cargo sorting, we monitored the colocalization



Figure 6

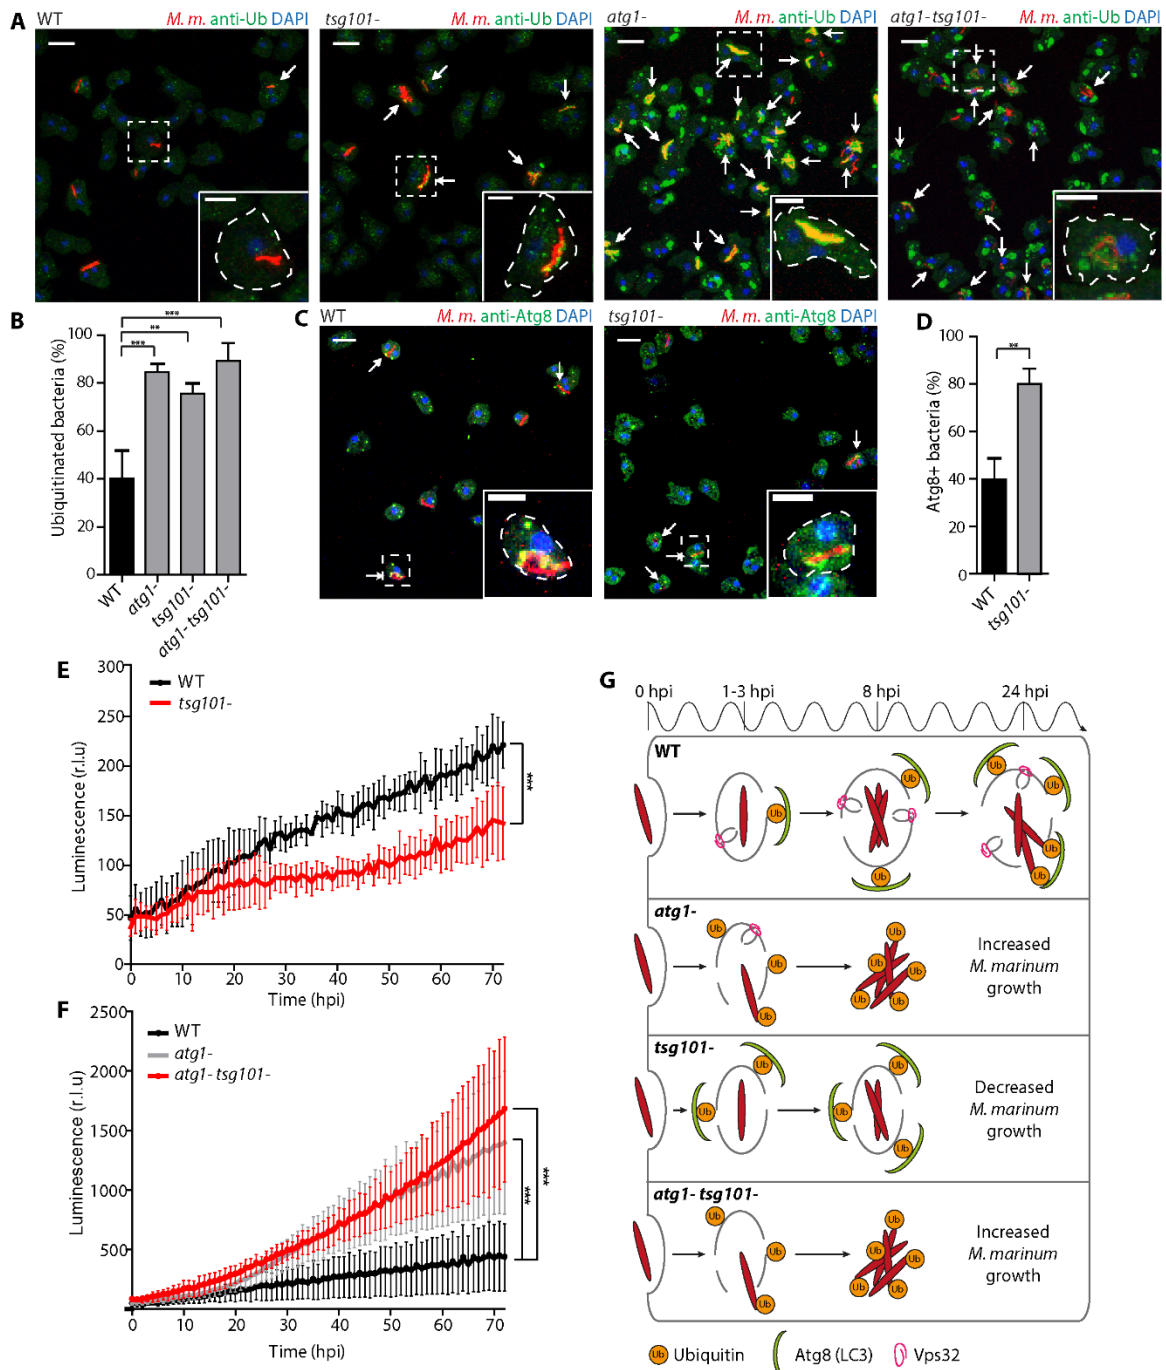

**Figure 6. Deficiency in membrane repair leads to earlier escape of *M. marinum* from the MCV and growth restriction by autophagy.**

(A) *D. discoideum* wt or mutant (*atg1-*, *tsg101-*, *atg1-tsg101-*) were infected with *M. marinum* and fixed for immunostaining at 8 hpi (*M. marinum* in red, ubiquitin in green, DAPI in blue). Arrows point to ubiquitinated bacteria. Scale bars, 10  $\mu$ m and 5  $\mu$ m for the insets. (B) Quantification of the proportion of ubiquitinated bacteria or bacterial microcolonies. The plot shows the mean and standard deviation (WT N=6, n=306; *atg1-* N=3, n= 251; *tsg101-* N=3, n= 93; *atg1-tsg101-* N=3, n= 215). (C) Wt or *tsg101-* cells were infected with *M. marinum* and fixed for immunostaining at 8 hpi (*M. marinum* in red, Atg8 in green, DAPI in blue). Arrows point to bacteria decorated with Atg8. Scale bars, 10  $\mu$ m and 5  $\mu$ m for the insets. (D) Quantification of the proportion of bacteria or bacterial microcolonies decorated with Atg8. The plot shows the mean and standard deviation. (WT N=3, n=70; *tsg101-* N=3, n= 63). Two-tailed *t*-tests were performed. (E-F) Wt or mutant *D. discoideum* were infected with luminescent *M. marinum* and intracellular bacterial growth was monitored in a plate reader over 72 hpi. *M. marinum* growth was restricted in the *tsg101-* mutant, whereas it hyperproliferates in the *atg1-* and the double *atg1-tsg101-* mutant. Plots represent the mean and standard deviation of N=3 independent experiments. Two-way ANOVA was performed. (G) Model of autophagy and ESCRT-III involvement in MCV repair and restriction of *M. marinum* intracellular growth. In wt *D. discoideum*, *M. marinum* induces ESX-1-dependent injuries in the MCV membrane. This leads to the separate recruitment of the ESCRT-III and autophagy machineries to repair the damage, but nevertheless the bacteria are able to access the cytosol at later stages of infection (24 hpi). In the *atg1-* mutant, *M. marinum* access the cytosol earlier, despite the membrane repair exerted by ESCRT-III. Bacteria accumulate ubiquitin and proliferate unrestrictedly in the cytosol devoid of a functional autophagy pathway. In the *tsg101-* mutant, membrane damage not repaired by ESCRT-III leads to an increase of ubiquitination and recruitment of the autophagy machinery, resulting in restriction of *M. marinum* growth. In a double *atg1-tsg101-* mutant, lack of both ESCRT-III and autophagic membrane repairs leads to an earlier access of bacteria to the cytosol, which accumulate ubiquitin and hyperproliferate as in the single *atg1-* mutant.

280 of bacteria with GFP-tagged perilipin (Plin). Plin is a lipid droplet protein that binds the cell wall of *M.*  
281 *marinum* as soon as the bacteria access the cytosol<sup>47</sup>. Like in *atg1-* cells<sup>47</sup>, recognition of cytosolic *M.*  
282 *marinum* by GFP-Plin was higher in *tsg101-* and *atg1- tsg101-* compared to wt cells (Fig. S4E-F),  
283 confirming the earlier bacteria escape from the MCV in cells lacking a functional ESCRT machinery.  
284 Altogether, these results suggest that both Tsg101 and Atg1 trigger separate membrane repair pathways and  
285 restrict *M. marinum* access to the cytosol during infection.

286 Since we have shown that Tsg101 is not essential for ESCRT-III recruitment to the damaged MCV  
287 (Fig. 2G-H), but has an important role in repairing the MCV and constraining bacteria escape (Fig. 6 and  
288 Supplementary Fig. 4), we wondered whether the accessory proteins AlxA and Alg2a/b, also known to  
289 recruit ESCRT-III, were involved in the repair of the MCV. In cells lacking Alg2a/b, the percentage of  
290 ubiquitinated *M. marinum* was comparable to that in its respective parental strain ( $43.3 \pm 15.0\%$  and  $50.2 \pm$   
291  $11.4\%$  respectively, Supplementary Fig. 5A-B and E) and, similarly, the degree of Atg8 colocalization with  
292 the bacteria remained lower in the *alg2a-/b-* mutant ( $54.70 \pm 9.5\%$ , Supplementary Fig. 5C-D and F). On  
293 the contrary,  $81.8 \pm 9.9\%$  of bacteria were ubiquitinated in cells devoid of AlxA, which correlated with a  
294 higher but not significant increase of Atg8 recruitment to the bacteria ( $72.7 \pm 13.0\%$ , Supplementary Fig.  
295 5A-F). This suggests that AlxA, together with Tsg101 but not Alg2a/b, contributes to the ESCRT-III-  
296 mediated repair of the MCV.

297

### 298 **Impairment of ESCRT or autophagy has a distinct impact on *M. marinum* intracellular growth**

299 To study how the ESCRT pathway may impact the outcome of *M. marinum* infection, the ESCRT mutants  
300 were infected with luminescent *M. marinum*<sup>48</sup> and intracellular bacterial growth monitored<sup>49</sup> (Fig. 6E-F and  
301 Supplementary Fig. 5G-H). *M. marinum* luminescence increased around 5- fold in wt *D. discoideum* in the  
302 course of 72 h, reflecting sustained intracellular growth. In the *atg1-* mutant, since bacteria escape earlier to  
303 a cytosol that is devoid of xenophagic defense, *M. marinum* grew better (Fig. 6F), as already described<sup>20</sup>.  
304 *M. marinum* proliferation in both ESCRT mutants *alxA-* and *alg2a-/b-* was similar to that in the wt  
305 (Supplementary Fig. 5G-H), suggesting no crucial involvement of these proteins in the infection course.

306 Importantly, loss of Tsg101 significantly suppressed *M. marinum* growth compared to wt cells (Fig. 6E).  
307 Interestingly, in the double mutant *atg1- tsg101-*, bacterial luminescence increased substantially, reaching  
308 similar levels as in the single *atg1-* mutant. Therefore, a functional autophagy pathway is necessary to  
309 control bacterial burden in the *tsg101-* mutant indicating that without ESCRT-III-mediated MCV repair the  
310 bacteria become more accessible to degradation by xenophagy. Taken together with the previous results on  
311 ubiquitination and Atg8 recruitment (Fig. 6 and Supplementary Fig. 5), we conclude that Tsg101 and AlxA  
312 but not Alg2a/b participate in the ESCRT-III-mediated repair of the MCV damage and thus absence of these  
313 proteins enables an earlier escape of *M. marinum* to the cytosol. In the case of *tsg101-*, this leads to the early  
314 recruitment of the autophagy machinery, which restricts bacterial growth.

315

## 316 **Discussion**

317 While most intracellular bacterial pathogens reside in a vesicular compartment where they exploit the host  
318 resources, a few bacteria have adapted to translocate to the host cytosol. The dynamics of escape to the  
319 cytosol varies depending on the pathogen. For instance, while *Shigella* and *Listeria* trigger an early escape,  
320 *Salmonella* and mycobacteria program a partial and/or delayed escape<sup>8</sup>. This is the case of *M. marinum*,  
321 which disrupts the MCV thanks to the membranolytic activity of ESAT-6, a small bacterial peptide secreted  
322 by the ESX-1 system<sup>50</sup>. Perforation of the MCV implies first the leakage of host and bacterial factors  
323 contained in its lumen and, eventually, bacteria access to nutrients in the cytosol, which must be sensed and  
324 restricted by the host. 3D EM inspection of infected *D. discoideum* cells revealed a very complex interface  
325 between *M. marinum* and the host cytosol at the site of MCV rupture (Fig. 1), suggesting a dynamic and  
326 complex interplay between bacterial and host factors. Here, we show that the two highly conserved ESCRT-  
327 III and autophagy pathways contribute to the repair of the MCV membrane, delaying the escape of *M.*  
328 *marinum* to the cytosol.

329 Like its mammalian homologs<sup>23, 24, 34, 38, 39</sup>, the *D. discoideum* ESCRT proteins Tsg101, Vps32 and  
330 Vps4 localized to injuries both at the plasma membrane and endomembranes upon damage by distinct  
331 chemical agents such as digitonin and LLOMe (Fig. 4A-B). Addition to the extracellular medium of ESAT-

332 6 led to the formation of comparable Vps32 and Vps4 foci (Supplementary Fig. 1). Importantly, *M. marinum*  
333 infection also leads to the appearance of Tsg101, Vps32 and Vps4 foci, patches or rings in the vicinity of  
334 the MCV (Fig. 2). Consistent with a role in membrane repair, these structures were significantly less  
335 abundant upon infection with *M. marinum*  $\Delta$ RD1, an attenuated mutant that lacks the ESX-1 secretion  
336 system and thus has reduced capability of inducing damage at the MCV. In agreement with its ability to  
337 form packed spiral polymers on membranes, upon both sterile injuries and infection, GFP-Vps32 structures  
338 were generally larger and longer-lived than the Vps4-GFP ones. Consistently, large ring-like structures were  
339 observed exclusively with GFP-Vps32 (Fig. 2E). Time-lapse microscopy revealed that GFP-Vps32 was  
340 recruited from the cytosolic pool, likely polymerized at wounds of the MCV, and remained associated with  
341 the MCV for several minutes (Fig. 3C).

342 The wounds inflicted by membrane disrupting agents such as LLOMe [less than 5 nm<sup>51</sup>] may be of  
343 comparable size to the ones caused by the mycobacterial membranolytic peptide ESAT-6 [4.5 nm<sup>6</sup>] and thus  
344 lead similarly to the recruitment of the ESCRT-III repair machinery. However, the sustained insults and  
345 cumulative damage inflicted by *M. marinum*<sup>52</sup> likely results from the constitutive secretion of ESAT-6 and  
346 also depends on PDIMs<sup>53, 54</sup>. Together, they probably generate heterogeneous and expanding wounds that  
347 are harder to resolve. This may explain why the recruitment of GFP-Vps32 to sterile damage depends strictly  
348 on Tsg101 (Fig. 5C-D), whereas during *M. marinum* infection this dependency is partial (Fig. 2G-H),  
349 because other ESCRT recruiting pathways likely act simultaneously. In addition, we propose that  
350 cumulative damage by *M. marinum* would eventually overwhelm membrane repair by ESCRT-III and result  
351 in recruitment of autophagy, as previously suggested for endosomal damage caused by LLOMe<sup>34</sup>. In the  
352 case of sterile damage to lysosomes, autophagy may end up degrading the severely injured compartments  
353 by lysophagy<sup>34</sup>. Regarding damage to the MCV, we propose that xenophagy generates a compartment that  
354 either kills the mycobacteria or creates a restrictive environment that somehow impairs the growth of the  
355 pathogen.

356 Upon digitonin treatment, GFP-Vps32 colocalized with Annexin V-labelled regions of the plasma  
357 membrane that were subsequently shed in the medium (Fig. 5-B). This suggests that plasma membrane



358 repair in *D. discoideum* might be achieved by ESCRT-III-dependent budding and scission of the wound, as  
359 in mammalian cells<sup>23,24</sup>. A similar repair mechanism, in this case by budding the injury towards the lumen,  
360 has also been described for the nuclear envelope<sup>39</sup>. We propose that the same process may operate at the  
361 MCV, which would partially explain the presence of abundant membranous material in the lumen of the  
362 MCV and the putative invagination of the MCV membrane remnants, as observed by EM and live  
363 microscopy (Fig. 1, 3B and Supplementary Fig. 3A).

364 *M. marinum* that accesses the host cytosol becomes ubiquitinated<sup>20</sup> and coated by Plin<sup>47</sup>. We used  
365 ubiquitination and recruitment of GFP-Plin as a proxy to monitor bacterial escape from the MCV in cells  
366 lacking Tsg101. Similar to the high ubiquitination previously shown to occur in amoebae deficient for  
367 autophagy<sup>20</sup>, large ubiquitin patches were observed at the sites of MCV rupture in *tsg101*- cells (Fig. 6A-  
368 B). Consistently, the percentage of bacteria coated by Plin was higher in this ESCRT mutant (Supplementary  
369 Fig. 4E-F). These results are consistent with the large ubiquitin patches observed on *M. smegmatis* in  
370 macrophages<sup>25</sup> and with the increased cytosolic bacterial spread observed during *L. monocytogenes*  
371 infection in S2 cells<sup>37</sup>. In addition to its role in bacteria restriction, autophagy has been proposed to mediate  
372 membrane repair of vacuoles containing *Salmonella*<sup>22</sup> and *Mycobacterium*<sup>20</sup>. Moreover, ESCRT-III has  
373 been shown to participate in endolysosomal membrane repair independently of lysophagy<sup>34</sup>. Here, we  
374 suggest that in *D. discoideum* autophagy and ESCRT-III work in parallel to repair the damaged MCV. It  
375 has been shown that ubiquitin serves as an “eat-me” signal that targets cytosolic bacteria to autophagic  
376 degradation<sup>2</sup>. Consistent with this, the accumulation of ubiquitin around *M. marinum* in *tsg101*- cells  
377 correlated with a proportional increase of Atg8 decoration on the bacteria (Fig. 6C-D), and with a decreased  
378 bacterial load (Fig. 6E), contrary to what has been described in RAW macrophages infected with the non-  
379 pathogenic, vacuolar *M. smegmatis*, in which depletion of Tsg101 led to bacteria hyperproliferation<sup>25</sup>. In  
380 addition, only very limited colocalization between GFP-Vps32 and ubiquitin or Atg8 was observed at  
381 damaged MCVs (Fig. 3E-F).

382 The cues and signals that recruit ESCRT-III to damage in *D. discoideum* are still to be identified.  
383 The appearance of ESCRT-III components before ubiquitinated material can be detected at the site of

384 lysosome disruptions<sup>34</sup> speaks for a ubiquitin-independent mechanism, although it cannot be excluded that  
385 ubiquitin might participate in a subsequent reinforcement loop to recruit ESCRT-III. In mammalian cells,  
386 several reports have suggested that influx of extracellular Ca<sup>2+</sup> through the plasma membrane or efflux  
387 through endolysosomal membranes are essential for the positioning of ESCRT-III to the site of the injury<sup>23</sup>,  
388 <sup>24, 34</sup>. The local increase of intracellular Ca<sup>2+</sup> at the wound site might be recognized directly by ALIX<sup>23</sup>, a  
389 multifunctional protein involved in cargo protein sorting into intraluminal vesicles [reviewed in<sup>55</sup>], thereby  
390 bypassing the need for ESCRT-0, -I and -II, and recruiting ESCRT-III by direct protein-protein interactions.  
391 Alternatively, Ca<sup>2+</sup> has been proposed to be sensed by ALG2, an ALIX-interacting protein with a penta EF-  
392 hand domain, which could promote the accumulation of ALIX, ESCRT-III and the Vps4 complex at the  
393 damage site<sup>24, 34</sup>. Strikingly, in *D. discoideum* intra- and extracellular Ca<sup>2+</sup> chelation did not impair GFP-  
394 Vps32 relocation to plasma membrane or lysosome injuries (Fig. 5E-F). Consistent with this result, Ca<sup>2+</sup>  
395 seemed also to be dispensable during MCV repair, since knockout of either *alxA* or *alg2a/b* did not impact  
396 intracellular *M. marinum* growth (Supplementary Fig. 5G-H). Altogether, our results suggest that the MCV  
397 damage caused by the *M. marinum* ESX-1 secretion system is repaired very robustly and in a multilayered  
398 response by both the ESCRT-III and the autophagy pathways of *D. discoideum* in a Tsg101-dependent and  
399 Ca<sup>2+</sup>-independent manner. The ability of the ESCRT-III to repair membranes injured by various biological  
400 and chemical insults strongly suggests that this is a generic mechanism that operates upon infection by other  
401 intracellular pathogens that damage membranes such as *Salmonella*, *Shigella* and *Listeria*. In addition, the  
402 high conservation of the ESCRT machinery identifies this pathway as a novel potential therapeutic target to  
403 fight against bacterial infection in humans.

404

## 405 **Materials and Methods**

### 406 ***D. discoideum* strains, culture and plasmids**

407 *D. discoideum* strains and plasmids are summarized in Supplementary Table 1. *D. discoideum* Ax2(Ka) was  
408 axenically cultured at 22°C in HI5c medium (Formedium) supplemented with 100 U mL<sup>-1</sup> of penicillin and  
409 100 µg mL<sup>-1</sup> of streptomycin (Invitrogen). *D. discoideum* JH10 was cultured similarly as Ax2(Ka), with the

410 addition of 100 g/mL of Thymidine (Sigma). Cells were transformed by electroporation and selected with  
411 the relevant antibiotic. Hygromycin, G418 and blasticidin were used at a concentration of 50, 5 and 5  $\mu\text{g}$   
412  $\text{mL}^{-1}$ , respectively. *D. discoideum* Ax2(Ka) *tsg101-* and *atg1-tsg101-* were obtained by transformation with  
413 the pSP72 KO vector kindly provided by Dr. L. Aubry<sup>56</sup>. JH10 *alxA-* and JH10 *alg2a-/b-* mutants were  
414 kindly provided by Dr. L. Aubrey<sup>57, 58</sup>. Ax2(Ka) cells expressing GFP-Atg8 and AmtA-mCherry were  
415 described in<sup>20</sup> and<sup>47</sup>, respectively. Ax2(Ka) cells expressing GFP-Vps32, Vps4-GFP and GFP-Tsg101 were  
416 generated by transformation with the vectors described in Supplementary Table 1. Cells expressing GFP-  
417 Plin were obtained upon transformation with the pDNeoGFP-Plin construct described in<sup>59</sup>.

418

#### 419 **Mycobacteria strains, culture and plasmids**

420 *M. marinum* strains and plasmids are summarized in Supplementary Table 1. *M. marinum* (M strain) wt and  
421  $\Delta\text{RD1}$  were kindly provided by Dr. L. Ramakhrisan<sup>20</sup>. Mycobacteria were cultured in 7H9 (Difco)  
422 supplemented with glycerol 0.2% (v/v) (Biosciences), Tween-20 0.05% (v/v) (Sigma) and OADC 10% (v/v)  
423 (Middlebrock). mCherry-expressing bacteria were obtained by transformation with pCherry10, which was  
424 kindly obtained from Dr. L. Ramakrishnan<sup>60</sup>, and cultured in the presence of 50  $\mu\text{g}/\text{mL}^{-1}$  hygromycin  
425 (Labforce). Luminiscent bacteria harbored the pMV306::*lux* plasmid<sup>48</sup> and were cultured in presence of 50  
426  $\mu\text{g mL}^{-1}$  kanamycin (AppliChem).

427

#### 428 **Infection assay**

429 Infections were performed as previously described<sup>61</sup>. In brief, *M. marinum* bacteria were washed in HI5c  
430 and centrifuged onto adherent *D. discoideum* cells. After additional 20-30 min of incubation, extracellular  
431 bacteria were washed off and the infected cells resuspended in HI5c containing 5 U  $\text{mL}^{-1}$  of penicillin and  
432 5  $\mu\text{g mL}^{-1}$  of streptomycin (Invitrogen). For live microscopy, mCherry expressing or unlabeled bacteria  
433 were used. To monitor bacteria intracellular growth in *D. discoideum*, luciferase-expressing *M. marinum*<sup>20</sup>.  
434 <sup>49</sup> were used.

435

436 **Intracellular growth measurement**

437 Growth of luminescent bacteria was measured as described previously<sup>20, 49</sup>. Briefly, dilutions of  $0.5\text{-}2.0 \times$   
438  $10^5$  *D. discoideum* cells infected with *M. marinum* pMV306::*lux* were plated on a non-treated, white F96  
439 MicroWell plate (Nunc) and covered with a gas permeable moisture barrier seal (Bioconcept).  
440 Luminescence was measured for 72 h at 1 h intervals with a Synergy Mx Monochromator-Based Multi-  
441 Mode Microplate Reader (Biotek). The temperature was kept constant at 25°C.

442

443 **Live fluorescence microscopy**

444 Infected or uninfected *D. discoideum* were plated in 35 mm Glass Bottom Dishes (MatTek) or in 4-wells  $\mu$ -  
445 slides (Ibidi). To induce damage in *D. discoideum* membranes, cells were incubated with 2.5-5  $\mu\text{M}$  of  
446 digitonin (Sigma), 5 mM of LLOMe (Bachem), 200  $\mu\text{M}$  of GPN or 60 mg mL<sup>-1</sup> of purified recombinant  
447 ESAT-6 (BEI Resources). To visualize the lumen of endocytic compartments, 0.5 mg mL<sup>-1</sup> of 70 KDa  
448 TRITC-Dextran or 10-15  $\mu\text{g mL}^{-1}$  of 10 kDa Alexa Fluor 647 Dextran (Molecular Probes) were added at  
449 least 3 h prior to visualization of the sample. To detect neutralization of endocytic vesicles, 0.2 mM of 524  
450 Da HPTS (Molecular Probes) was added at least 3 h prior to the visualization of the sample. To detect  
451 plasma membrane damage, 5  $\mu\text{M}$  of Annexin V Alexa Fluor 594 conjugate (Molecular Probes) was added  
452 to cells in the presence of 2.5 mM Ca<sup>2+</sup>. To chelate Ca<sup>2+</sup>, 5 mM of EGTA (Fluka) or 5 mM of EGTA and  
453 250  $\mu\text{M}$  of BAPTA-AM (Sigma) were added at least 20 min before imaging. Bacteria not expressing a  
454 fluorescent reporter were stained with 12.5  $\mu\text{M}$  of Vybrant DyeCycle Ruby stain (Molecular Probes) directly  
455 on the  $\mu$ -dish prior to microscopic inspection. Live microscopy was performed with a Spinning Disc  
456 Confocal Microscope [Intelligent Imaging Innovations Marianas SDC mounted on an inverted microscope  
457 (Leica DMIRE2)] with a glycerin 63x or an oil 100x objective. Generally, z-stacks from 3 to 10 slices of 1  
458  $\mu\text{m}$  or 1.5  $\mu\text{m}$  were acquired. For time-lapse experiments, images were acquired from every 15 s to several  
459 min. Image analysis was performed using ImageJ.

460

461

## 462 **Cell fixation and immunofluorescence stainings**

463 Samples were fixed in ultracold methanol as already described<sup>62</sup>. Briefly, *D. discoideum* cells on coverslips  
464 were quickly fixed by immersion in -85°C methanol using a Freezing Dewar (FH Cryotec,  
465 Instrumentenbedarf Kryoelektronenmikroskopie). Subsequent immunofluorescence staining was performed  
466 as described<sup>62</sup>. Rabbit anti-Atg8 was previously described<sup>20</sup>, anti-p80<sup>63</sup> was purchased from the Geneva  
467 Antibody Facility (<http://www.unige.ch/antibodies>), the anti-Ub (FK2) monoclonal antibody was from Enzo  
468 Life Sciences<sup>20</sup>. Nuclei were stained with DAPI (Molecular Probes). Cells were embedded using  
469 ProlongGold antifade (Molecular Probes). Images were acquired with a LSM700 or LSM780 microscope  
470 (Zeiss) using an oil 63x objective. Image analysis was performed using ImageJ.

471

## 472 **Transmission Electron Microscopy (TEM)**

473 Sample preparation for TEM was performed as described in<sup>64</sup>. Briefly, *D. discoideum* cells were fixed in a  
474 6 cm dish in 2% (w/v) glutaraldehyde in H15c for 1 h and stained with 2% (w/v) OsO<sub>4</sub> in imidazole buffer  
475 0.1 M for 30 min. Cells were detached with a cell scraper and washed 3 times with PBS. Subsequent sample  
476 preparation was performed at the Pôle Facultaire de Microscopie Ultrastructurale (University of Geneva).  
477 Samples were incubated in 2% (v/v) of Millonig buffer and rinsed with distilled water. Then, they were  
478 incubated in 0.25% (w/v) uranyl acetate overnight and rinsed with distilled water. Samples were dehydrated  
479 using increasing concentrations of ethanol, then in propylene oxide for 10 min and finally embedded in 50%  
480 Epon-propylene oxide for 1h, followed by incubation overnight in pure Epon. Samples were embedded in  
481 2% agar for subsequent sectioning in an ultramicrotome and placed on TEM grids. Finally, sections were  
482 visualized in a Tecnai 20 electron microscope (FEI Company, Eindhoven, The Netherlands).

483

## 484 **Focus Ion Beam Scanning Electron Microscopy (FIB-SEM)**

485 Initial sample preparation was performed similarly as for TEM and sent to the Pôle Facultaire de  
486 Microscopie Ultrastructurale (University of Geneva). Subsequent contrast enhancement, dehydration and  
487 resin embedding was performed as described in<sup>65</sup> Samples were visualized in a Helios DualBeam NanoLab

488 660 SEM (Fei Company, Eindhoven, The Netherlands). 3 D reconstitutions were performed using the  
489 LimeSeg plugin from ImageJ.

490

#### 491 **Statistics**

492 All graphs were plotted and statistical analysis were performed using Prism. In all quantifications, the mean  
493 and standard deviation is shown. Two-tailed t-test or 2-way ANOVA was used (n.s: non-significant, \*: p-  
494 value < 0.05, \*\*: p-value < 0.01, \*\*\*: p-value < 0.001).

495

#### 496 **References**

- 497 1. Soldati T, Neyrolles O. Mycobacteria and the intraphagosomal environment: take it with a pinch of  
498 salt(s)! *Traffic* **13**, 1042-1052 (2012).
- 499 2. Boyle KB, Randow F. The role of 'eat-me' signals and autophagy cargo receptors in innate immunity.  
500 *Curr Opin Microbiol* **16**, 339-348 (2013).
- 501 3. Hagedorn M, Soldati T. Flotillin and RacH modulate the intracellular immunity of Dictyostelium to  
502 Mycobacterium marinum infection. *Cell Microbiol* **9**, 2716-2733 (2007).
- 503 4. Jordao L, Vieira OV. Tuberculosis: new aspects of an old disease. *Int J Cell Biol* **2011**, 403623 (2011).
- 504 5. Pym AS, Brodin P, Brosch R, Huerre M, Cole ST. Loss of RD1 contributed to the attenuation of the  
505 live tuberculosis vaccines Mycobacterium bovis BCG and Mycobacterium microti. *Mol Microbiol* **46**,  
506 709-717 (2002).
- 507 6. Smith J, *et al.* Evidence for pore formation in host cell membranes by ESX-1-secreted ESAT-6 and its  
508 role in Mycobacterium marinum escape from the vacuole. *Infect Immun* **76**, 5478-5487 (2008).
- 509 7. van der Wel N, *et al.* M. tuberculosis and M. leprae translocate from the phagolysosome to the cytosol  
510 in myeloid cells. *Cell* **129**, 1287-1298 (2007).
- 511 8. Friedrich N, Hagedorn M, Soldati-Favre D, Soldati T. Prison break: pathogens' strategies to egress  
512 from host cells. *Microbiol Mol Biol Rev* **76**, 707-720 (2012).

- 513 9. Cardenal-Munoz E, Barisch C, Lefrancois LH, Lopez-Jimenez AT, Soldati T. When Dicty Met Myco,  
514 a (Not So) Romantic Story about One Amoeba and Its Intracellular Pathogen. *Front Cell Infect*  
515 *Microbiol* **7**, 529 (2018).
- 516 10. Pei G, *et al.* The E3 ubiquitin ligase NEDD4 enhances killing of membrane-perturbing intracellular  
517 bacteria by promoting autophagy. *Autophagy* **13**, 2041-2055 (2017).
- 518 11. Franco LH, *et al.* The Ubiquitin Ligase Smurf1 Functions in Selective Autophagy of Mycobacterium  
519 tuberculosis and Anti-tuberculous Host Defense. *Cell Host Microbe* **22**, 421-423 (2017).
- 520 12. Chauhan S, *et al.* TRIMs and Galectins Globally Cooperate and TRIM16 and Galectin-3 Co-direct  
521 Autophagy in Endomembrane Damage Homeostasis. *Dev Cell* **39**, 13-27 (2016).
- 522 13. Beatty WL, Rhoades ER, Hsu DK, Liu FT, Russell DG. Association of a macrophage galactoside-  
523 binding protein with Mycobacterium-containing phagosomes. *Cell Microbiol* **4**, 167-176 (2002).
- 524 14. Schnettger L, *et al.* A Rab20-Dependent Membrane Trafficking Pathway Controls M. tuberculosis  
525 Replication by Regulating Phagosome Spaciousness and Integrity. *Cell Host Microbe* **21**, 619-628 e615  
526 (2017).
- 527 15. Sada-Ovalle I, *et al.* The Tim3-galectin 9 pathway induces antibacterial activity in human macrophages  
528 infected with Mycobacterium tuberculosis. *J Immunol* **189**, 5896-5902 (2012).
- 529 16. Jayaraman P, *et al.* Tim3 binding to galectin-9 stimulates antimicrobial immunity. *J Exp Med* **207**,  
530 2343-2354 (2010).
- 531 17. Thurston TL, Wandel MP, von Muhlinen N, Foeglein A, Randow F. Galectin 8 targets damaged  
532 vesicles for autophagy to defend cells against bacterial invasion. *Nature* **482**, 414-418 (2012).
- 533 18. Paz I, *et al.* Galectin-3, a marker for vacuole lysis by invasive pathogens. *Cell Microbiol* **12**, 530-544  
534 (2010).
- 535 19. Jia J, *et al.* Galectins Control mTOR in Response to Endomembrane Damage. *Mol Cell* **70**, 120-135  
536 e128 (2018).



- 537 20. Cardenal-Munoz E, *et al.* Mycobacterium marinum antagonistically induces an autophagic response  
538 while repressing the autophagic flux in a TORC1- and ESX-1-dependent manner. *PLoS Pathog* **13**,  
539 e1006344 (2017).
- 540 21. Jo EK. Autophagy as an innate defense against mycobacteria. *Pathog Dis* **67**, 108-118 (2013).
- 541 22. Kreibich S, *et al.* Autophagy Proteins Promote Repair of Endosomal Membranes Damaged by the  
542 Salmonella Type Three Secretion System 1. *Cell Host Microbe* **18**, 527-537 (2015).
- 543 23. Jimenez AJ, *et al.* ESCRT machinery is required for plasma membrane repair. *Science* **343**, 1247136  
544 (2014).
- 545 24. Scheffer LL, *et al.* Mechanism of Ca<sup>2+</sup>(+)-triggered ESCRT assembly and regulation of cell  
546 membrane repair. *Nat Commun* **5**, 5646 (2014).
- 547 25. Philips JA, Porto MC, Wang H, Rubin EJ, Perrimon N. ESCRT factors restrict mycobacterial growth.  
548 *Proc Natl Acad Sci USA* **105**, 3070–3075 (2008).
- 549 26. Chiaruttini N, *et al.* Relaxation of Loaded ESCRT-III Spiral Springs Drives Membrane Deformation.  
550 *Cell* **163**, 866-879 (2015).
- 551 27. Lata S, *et al.* Helical structures of ESCRT-III are disassembled by VPS4. *Science* **321**, 1354-1357  
552 (2008).
- 553 28. Saksena S, Wahlman J, Teis D, Johnson AE, Emr SD. Functional reconstitution of ESCRT-III  
554 assembly and disassembly. *Cell* **136**, 97-109 (2009).
- 555 29. Teis D, Saksena S, Emr SD. Ordered assembly of the ESCRT-III complex on endosomes is required  
556 to sequester cargo during MVB formation. *Dev Cell* **15**, 578-589 (2008).
- 557 30. Frankel EB, Audhya A. ESCRT-dependent cargo sorting at multivesicular endosomes. *Semin Cell Dev*  
558 *Biol* **74**, 4-10 (2018).
- 559 31. Votteler J, Sundquist WI. Virus budding and the ESCRT pathway. *Cell Host Microbe* **14**, 232-241  
560 (2013).
- 561 32. Stoten CL, Carlton JG. ESCRT-dependent control of membrane remodelling during cell division.  
562 *Semin Cell Dev Biol* **74**, 50-65 (2018).



- 563 33. Hurley JH. ESCRTs are everywhere. *EMBO J* **34**, 2398-2407 (2015).
- 564 34. Skowrya ML, Schlesinger PH, Naismith TV, Hanson PI. Triggered recruitment of ESCRT machinery  
565 promotes endolysosomal repair. *Science* **360**, (2018).
- 566 35. Philips JA, Rubin EJ, Perrimon N. Drosophila RNAi Screen Reveals CD36 Family Member Required  
567 for Mycobacterial Infection. *Science*, 1251-1253 (2005).
- 568 36. Agaisse H, *et al.* Genome-Wide RNAi Screen for Host Factors Required for Intracellular Bacterial  
569 Infection. *Science* **309**, 1248-1251 (2005).
- 570 37. Cheng LW, *et al.* Use of RNA interference in Drosophila S2 cells to identify host pathways controlling  
571 compartmentalization of an intracellular pathogen. *Proc Natl Acad Sci USA* **102**, 13646–13651 (2005).
- 572 38. Raab M, *et al.* ESCRT III repairs nuclear envelope ruptures during cell migration to limit DNA damage  
573 and cell death. *Science* **352**, 359-362 (2016).
- 574 39. Denais CM, *et al.* Nuclear envelope rupture and repair during cancer cell migration. *Science* **352**, 353-  
575 358 (2016).
- 576 40. Dunn JD, *et al.* Eat Prey, Live: Dictyostelium discoideum As a Model for Cell-Autonomous Defenses.  
577 *Front Immunol* **8**, 1906 (2017).
- 578 41. Mattei S, Klein G, Satre M, Aubry L. Trafficking and developmental signaling: Alix at the crossroads.  
579 *Eur J Cell Biol* **85**, 925-936 (2006).
- 580 42. Collins CA, *et al.* Atg5-independent sequestration of ubiquitinated mycobacteria. *PLoS Pathog* **5**,  
581 e1000430 (2009).
- 582 43. Lerena MC, Colombo MI. Mycobacterium marinum induces a marked LC3 recruitment to its  
583 containing phagosome that depends on a functional ESX-1 secretion system. *Cell Microbiol* **13**, 814-  
584 835 (2011).
- 585 44. Schoneberg J, Lee IH, Iwasa JH, Hurley JH. Reverse-topology membrane scission by the ESCRT  
586 proteins. *Nat Rev Mol Cell Biol* **18**, 5-17 (2017).
- 587 45. Shields SB, Piper RC. How ubiquitin functions with ESCRTs. *Traffic* **12**, 1306-1317 (2011).

- 588 46. Raiborg C, Stenmark H. The ESCRT machinery in endosomal sorting of ubiquitylated membrane  
589 proteins. *Nature* **458**, 445-452 (2009).
- 590 47. Barisch C, Paschke P, Hagedorn M, Maniak M, Soldati T. Lipid droplet dynamics at early stages of  
591 *Mycobacterium marinum* infection in *Dictyostelium*. *Cell Microbiol* **17**, 1332-1349 (2015).
- 592 48. Andreu N, *et al.* Optimisation of bioluminescent reporters for use with mycobacteria. *PLoS One* **5**,  
593 e10777 (2010).
- 594 49. Arafah S, *et al.* Setting up and monitoring an infection of *Dictyostelium discoideum* with mycobacteria.  
595 *Methods Mol Biol* **983**, 403-417 (2013).
- 596 50. Gao LY, *et al.* A mycobacterial virulence gene cluster extending RD1 is required for cytolysis, bacterial  
597 spreading and ESAT-6 secretion. *Mol Microbiol* **53**, 1677-1693 (2004).
- 598 51. Repnik U, *et al.* L-leucyl-L-leucine methyl ester does not release cysteine cathepsins to the cytosol but  
599 inactivates them in transiently permeabilized lysosomes. *J Cell Sci* **130**, 3124-3140 (2017).
- 600 52. Conrad WH, *et al.* Mycobacterial ESX-1 secretion system mediates host cell lysis through bacterium  
601 contact-dependent gross membrane disruptions. *Proc Natl Acad Sci U S A* **114**, 1371-1376 (2017).
- 602 53. Augenstreich J, *et al.* ESX-1 and phthiocerol dimycocerosates of *Mycobacterium tuberculosis* act in  
603 concert to cause phagosomal rupture and host cell apoptosis. *Cell Microbiol* **19**, (2017).
- 604 54. Lerner TR, *et al.* Phthiocerol dimycocerosates promote access to the cytosol and intracellular burden  
605 of *Mycobacterium tuberculosis* in lymphatic endothelial cells. *BMC Biol* **16**, 1 (2018).
- 606 55. Bissig C, Gruenberg J. ALIX and the multivesicular endosome: ALIX in Wonderland. *Trends Cell Biol*  
607 **24**, 19-25 (2014).
- 608 56. Blanc C, *et al.* *Dictyostelium* Tom1 participates to an ancestral ESCRT-0 complex. *Traffic* **10**, 161-  
609 171 (2009).
- 610 57. Mattei S, *et al.* Dd-Alix, a conserved endosome-associated protein, controls *Dictyostelium*  
611 development. *Dev Biol* **279**, 99-113 (2005).

- 612 58. Aubry L, *et al.* Biochemical characterization of two analogues of the apoptosis-linked gene 2 protein  
613 in Dictyostelium discoideum and interaction with a physiological partner in mammals, murine Alix. *J*  
614 *Biol Chem* **277**, 21947-21954 (2002).
- 615 59. Du X, *et al.* Dictyostelium lipid droplets host novel proteins. *Eukaryot Cell* **12**, 1517-1529 (2013).
- 616 60. Carroll P, *et al.* Sensitive detection of gene expression in mycobacteria under replicating and non-  
617 replicating conditions using optimized far-red reporters. *PLoS One* **5**, e9823 (2010).
- 618 61. Barisch C, Lopez-Jimenez AT, Soldati T. Live imaging of Mycobacterium marinum infection in  
619 Dictyostelium discoideum. *Methods Mol Biol* **1285**, 369-385 (2015).
- 620 62. Hagedorn M, Neuhaus E, Soldati T. Optimized Fixation and Immunofluorescence Staining Methods  
621 for Dictyostelium Cells. *Methods Mol Biol* **346**, 327-338. (2006).
- 622 63. Ravanel K, *et al.* Membrane sorting in the endocytic and phagocytic pathway of Dictyostelium  
623 discoideum. *Eur J Cell Biol* **80**, 754-764 (2001).
- 624 64. Barisch C, Soldati T. Mycobacterium marinum Degrades Both Triacylglycerols and Phospholipids  
625 from Its Dictyostelium Host to Synthesise Its Own Triacylglycerols and Generate Lipid Inclusions.  
626 *PLoS Pathog* **13**, e1006095 (2017).
- 627 65. Vernay A, *et al.* MitoNEET-dependent formation of intermitochondrial junctions. *Proc Natl Acad Sci*  
628 *U S A* **114**, 8277-8282 (2017).

629

### 630 **Acknowledgements**

631 We would like to acknowledge Dr. Laurence Aubry for her generous gift of antibodies and *D. discoideum*  
632 ESCRT mutant strains, Dr. Sonia Arafah for the generation of the *tsg101*- mutant and preliminary work on  
633 intracellular growth measurements, Ms Iryna Nikonenko and the PFMU platform of the Centre Medical  
634 Universitaire for processing the samples for TEM and FIB-SEM, and the Bioimaging Platform of the  
635 Faculty of Sciences. LG and MH were supported by a grant from the Deutsche Forschungsgemeinschaft  
636 (HA3474/3-2), and JSK by a Royal Society University Research Fellowship (UF140624). The TS lab is

637 supported by grants from the Swiss National Science Foundation (310030\_149390 and 310030\_169386)  
638 and the SystemsX.ch initiative grant HostPathX.

639

640 **Authors contributions**

641 Conceived and designed the experiments: ATLJ, TS. Performed the experiments: ATLJ, FL, ECM.

642 Analysed the data: ATLJ, ECM. Contributed reagents/material/analysis tools: ATL, FL, LG, MH, JSK.

643 Wrote the original draft: ATLJ, TS. Reviewing & editing: ATLJ, ECM, MH, JSK, TS.

644

645 **Competing interests**

646 The authors declare no competing interests
